# Supplementary material for: Comprehensive analysis of the lncRNA-associated ceRNA network identifies neuroinflammation biomarkers for Alzheimer's disease
Source: Royal Society of Chemistry journal article supplement (doi:10.1039/c9mo00129h), 2019-11-22
Supplement: c9mo00129h1.zip [file Table_S1.xls]

## Sheet: Sheet1
Table S1. The list of lncRNA-associated lncRNA-miRNA-mRNA crosstalks
Protein coding genes	miRNAs	LncRNAs
C10orf76	hsa-let-7a-5p	AC074117.10
GPR156	hsa-let-7a-5p	AC074117.10
FAM103A1	hsa-let-7a-5p	AC074117.10
CLP1	hsa-let-7a-5p	AC074117.10
CMTM3	hsa-let-7a-5p	AC074117.10
GSR	hsa-let-7a-5p	AC074117.10
EPT1	hsa-let-7a-5p	AC074117.10
CTNS	hsa-let-7a-5p	AC074117.10
ATF7	hsa-let-7a-5p	AC074117.10
DCAF15	hsa-let-7a-5p	AC074117.10
HAS2	hsa-let-7a-5p	AC074117.10
CEBPD	hsa-let-7a-5p	AC074117.10
EZH2	hsa-let-7a-5p	AC074117.10
BZW2	hsa-let-7a-5p	AC074117.10
GPCPD1	hsa-let-7a-5p	AC074117.10
EPB41L4A	hsa-let-7a-5p	AC074117.10
EMB	hsa-let-7a-5p	AC074117.10
ARL6IP6	hsa-let-7a-5p	AC074117.10
BEND4	hsa-let-7a-5p	AC074117.10
GTF2I	hsa-let-7a-5p	AC074117.10
CTNNBL1	hsa-let-7a-5p	AC074117.10
DAB2IP	hsa-let-7a-5p	AC074117.10
HS2ST1	hsa-let-7a-5p	AC074117.10
IFNGR1	hsa-let-7a-5p	AC074117.10
DENND2D	hsa-let-7a-5p	AC074117.10
CISH	hsa-let-7a-5p	AC074117.10
CHRNA5	hsa-let-7a-5p	AC074117.10
CEP135	hsa-let-7a-5p	AC074117.10
COL4A1	hsa-let-7a-5p	AC074117.10
DVL3	hsa-let-7a-5p	AC074117.10
FAM32A	hsa-let-7a-5p	AC074117.10
ARAP3	hsa-let-7a-5p	AC074117.10
CPEB4	hsa-let-7a-5p	AC074117.10
FBXO45	hsa-let-7a-5p	AC074117.10
ATP6V1C1	hsa-let-7a-5p	AC074117.10
FGD4	hsa-let-7a-5p	AC074117.10
FBXW8	hsa-let-7a-5p	AC074117.10
IGSF3	hsa-let-7a-5p	AC074117.10
ERCC6	hsa-let-7a-5p	AC074117.10
BZW1	hsa-let-7a-5p	AC074117.10
BTG2	hsa-let-7a-5p	AC074117.10
GRPEL2	hsa-let-7a-5p	AC074117.10
COL19A1	hsa-let-7a-5p	AC074117.10
COL5A1	hsa-let-7a-5p	AC074117.10
CANT1	hsa-let-7a-5p	AC074117.10
FAM46A	hsa-let-7a-5p	AC074117.10
CCL3	hsa-let-7a-5p	AC074117.10
CCNG1	hsa-let-7a-5p	AC074117.10
HIF1AN	hsa-let-7a-5p	AC074117.10
HMGA1	hsa-let-7a-5p	AC074117.10
GORAB	hsa-let-7a-5p	AC074117.10
GOLT1B	hsa-let-7a-5p	AC074117.10
CIAO1	hsa-let-7a-5p	AC074117.10
CHST3	hsa-let-7a-5p	AC074117.10
B4GALT7	hsa-let-7a-5p	AC074117.10
EGLN3	hsa-let-7a-5p	AC074117.10
ANKFY1	hsa-let-7a-5p	AC074117.10
COL1A1	hsa-let-7a-5p	AC074117.10
C9orf40	hsa-let-7a-5p	AC074117.10
CORO1B	hsa-let-7a-5p	AC074117.10
CAND1	hsa-let-7a-5p	AC074117.10
FOXC1	hsa-let-7a-5p	AC074117.10
GALNT7	hsa-let-7a-5p	AC074117.10
IDH2	hsa-let-7a-5p	AC074117.10
HOXC5	hsa-let-7a-5p	AC074117.10
DIAPH3	hsa-let-7a-5p	AC074117.10
HIC1	hsa-let-7a-5p	AC074117.10
ABCB7	hsa-let-7a-5p	AC074117.10
FAM127A	hsa-let-7a-5p	AC074117.10
FAM135A	hsa-let-7a-5p	AC074117.10
DUSP16	hsa-let-7a-5p	AC074117.10
CNOT7	hsa-let-7a-5p	AC074117.10
ACVR2A	hsa-let-7a-5p	AC074117.10
CNTRL	hsa-let-7a-5p	AC074117.10
KCMF1	hsa-let-7a-5p	AC074117.10
FOXN3	hsa-let-7a-5p	AC074117.10
GALC	hsa-let-7a-5p	AC074117.10
CMTM6	hsa-let-7a-5p	AC074117.10
EDC4	hsa-let-7a-5p	AC074117.10
KCNMB4	hsa-let-7a-5p	AC074117.10
KAT2B	hsa-let-7a-5p	AC074117.10
DPH3	hsa-let-7a-5p	AC074117.10
ACAD9	hsa-let-7a-5p	AC074117.10
C20orf194	hsa-let-7a-5p	AC074117.10
DRAM1	hsa-let-7a-5p	AC074117.10
ELK3	hsa-let-7a-5p	AC074117.10
IRS2	hsa-let-7a-5p	AC074117.10
CCNY	hsa-let-7a-5p	AC074117.10
HELZ	hsa-let-7a-5p	AC074117.10
AURKB	hsa-let-7a-5p	AC074117.10
IL6	hsa-let-7a-5p	AC074117.10
ANAPC13	hsa-let-7a-5p	AC074117.10
ATP6V1C1	hsa-let-7g-5p	AC074117.10
ACAD9	hsa-let-7g-5p	AC074117.10
DVL3	hsa-let-7g-5p	AC074117.10
KAT2B	hsa-let-7g-5p	AC074117.10
AURKB	hsa-let-7g-5p	AC074117.10
KCNMB4	hsa-let-7g-5p	AC074117.10
GALNT7	hsa-let-7g-5p	AC074117.10
ANKFY1	hsa-let-7g-5p	AC074117.10
DPH3	hsa-let-7g-5p	AC074117.10
CLP1	hsa-let-7g-5p	AC074117.10
CPEB3	hsa-let-7g-5p	AC074117.10
ATF7	hsa-let-7g-5p	AC074117.10
ABCD4	hsa-let-7g-5p	AC074117.10
KCMF1	hsa-let-7g-5p	AC074117.10
AKT2	hsa-let-7g-5p	AC074117.10
GJC1	hsa-let-7g-5p	AC074117.10
CHST3	hsa-let-7g-5p	AC074117.10
GALC	hsa-let-7g-5p	AC074117.10
FOXJ3	hsa-let-7g-5p	AC074117.10
ARL6IP6	hsa-let-7g-5p	AC074117.10
JPH3	hsa-let-7g-5p	AC074117.10
HELZ	hsa-let-7g-5p	AC074117.10
DPY19L4	hsa-let-7g-5p	AC074117.10
DRAM1	hsa-let-7g-5p	AC074117.10
DUSP16	hsa-let-7g-5p	AC074117.10
CANT1	hsa-let-7g-5p	AC074117.10
ACVR2A	hsa-let-7g-5p	AC074117.10
AKR1B1	hsa-let-7g-5p	AC074117.10
CHRNA5	hsa-let-7g-5p	AC074117.10
IFNGR1	hsa-let-7g-5p	AC074117.10
IGSF3	hsa-let-7g-5p	AC074117.10
FOXC1	hsa-let-7g-5p	AC074117.10
BZW1	hsa-let-7g-5p	AC074117.10
FOXN3	hsa-let-7g-5p	AC074117.10
IRF2	hsa-let-7g-5p	AC074117.10
BZW2	hsa-let-7g-5p	AC074117.10
C10orf76	hsa-let-7g-5p	AC074117.10
HHEX	hsa-let-7g-5p	AC074117.10
GJB4	hsa-let-7g-5p	AC074117.10
CUL5	hsa-let-7g-5p	AC074117.10
HIF1AN	hsa-let-7g-5p	AC074117.10
IFNAR1	hsa-let-7g-5p	AC074117.10
CDYL	hsa-let-7g-5p	AC074117.10
GPCPD1	hsa-let-7g-5p	AC074117.10
FOXF1	hsa-let-7g-5p	AC074117.10
FAM103A1	hsa-let-7g-5p	AC074117.10
JAZF1	hsa-let-7g-5p	AC074117.10
GTF2I	hsa-let-7g-5p	AC074117.10
DCLRE1B	hsa-let-7g-5p	AC074117.10
DENND2D	hsa-let-7g-5p	AC074117.10
DCUN1D3	hsa-let-7g-5p	AC074117.10
COL19A1	hsa-let-7g-5p	AC074117.10
CAND1	hsa-let-7g-5p	AC074117.10
CCND1	hsa-let-7g-5p	AC074117.10
ACSL5	hsa-let-7g-5p	AC074117.10
IER3IP1	hsa-let-7g-5p	AC074117.10
HS2ST1	hsa-let-7g-5p	AC074117.10
CMTM3	hsa-let-7g-5p	AC074117.10
CMTM6	hsa-let-7g-5p	AC074117.10
ENSA	hsa-let-7g-5p	AC074117.10
ITGA4	hsa-let-7g-5p	AC074117.10
CNPY3	hsa-let-7g-5p	AC074117.10
HGF	hsa-let-7g-5p	AC074117.10
COL4A3BP	hsa-let-7g-5p	AC074117.10
CLGN	hsa-let-7g-5p	AC074117.10
C1orf21	hsa-let-7g-5p	AC074117.10
CPSF2	hsa-let-7g-5p	AC074117.10
BTBD3	hsa-let-7g-5p	AC074117.10
CISH	hsa-let-7g-5p	AC074117.10
CCNG1	hsa-let-7g-5p	AC074117.10
DAGLA	hsa-let-7g-5p	AC074117.10
ANKRD52	hsa-let-7g-5p	AC074117.10
DIAPH3	hsa-let-7g-5p	AC074117.10
GRPEL2	hsa-let-7g-5p	AC074117.10
DCAF15	hsa-let-7g-5p	AC074117.10
HAS2	hsa-let-7g-5p	AC074117.10
HIC1	hsa-let-7g-5p	AC074117.10
HNRNPC	hsa-let-7g-5p	AC074117.10
BTG2	hsa-let-7g-5p	AC074117.10
C8orf58	hsa-let-7g-5p	AC074117.10
EZH2	hsa-let-7g-5p	AC074117.10
EMB	hsa-let-7g-5p	AC074117.10
EDN1	hsa-let-7g-5p	AC074117.10
CEBPD	hsa-let-7g-5p	AC074117.10
EGLN1	hsa-let-7g-5p	AC074117.10
IQGAP1	hsa-let-7g-5p	AC074117.10
CCNY	hsa-let-7g-5p	AC074117.10
GOLT1B	hsa-let-7g-5p	AC074117.10
DOCK9	hsa-miR-100-5p	CTD-2651B20.7
FKBP5	hsa-miR-100-5p	CTD-2651B20.7
AFAP1L1	hsa-miR-100-5p	CTD-2651B20.7
C20orf194	hsa-miR-100-5p	CTD-2651B20.7
FOXJ3	hsa-miR-100-5p	CTD-2651B20.7
CAMKK2	hsa-miR-103a-3p	AC016747.3
CAMKK2	hsa-miR-103a-3p	CTD-2196E14.9
CAMKK2	hsa-miR-103a-3p	DLX6-AS1
APOOL	hsa-miR-103a-3p	AC016747.3
APOOL	hsa-miR-103a-3p	CTD-2196E14.9
APOOL	hsa-miR-103a-3p	DLX6-AS1
C6orf62	hsa-miR-103a-3p	AC016747.3
C6orf62	hsa-miR-103a-3p	CTD-2196E14.9
C6orf62	hsa-miR-103a-3p	DLX6-AS1
C19orf12	hsa-miR-103a-3p	AC016747.3
C19orf12	hsa-miR-103a-3p	CTD-2196E14.9
C19orf12	hsa-miR-103a-3p	DLX6-AS1
CCNY	hsa-miR-103a-3p	AC016747.3
CCNY	hsa-miR-103a-3p	CTD-2196E14.9
CCNY	hsa-miR-103a-3p	DLX6-AS1
DHRS4L2	hsa-miR-103a-3p	AC016747.3
DHRS4L2	hsa-miR-103a-3p	CTD-2196E14.9
DHRS4L2	hsa-miR-103a-3p	DLX6-AS1
C16orf72	hsa-miR-103a-3p	AC016747.3
C16orf72	hsa-miR-103a-3p	CTD-2196E14.9
C16orf72	hsa-miR-103a-3p	DLX6-AS1
ARF1	hsa-miR-103a-3p	AC016747.3
ARF1	hsa-miR-103a-3p	CTD-2196E14.9
ARF1	hsa-miR-103a-3p	DLX6-AS1
COL19A1	hsa-miR-103a-3p	AC016747.3
COL19A1	hsa-miR-103a-3p	CTD-2196E14.9
COL19A1	hsa-miR-103a-3p	DLX6-AS1
APLN	hsa-miR-103a-3p	AC016747.3
APLN	hsa-miR-103a-3p	CTD-2196E14.9
APLN	hsa-miR-103a-3p	DLX6-AS1
DNAJB14	hsa-miR-103a-3p	AC016747.3
DNAJB14	hsa-miR-103a-3p	CTD-2196E14.9
DNAJB14	hsa-miR-103a-3p	DLX6-AS1
CCNG1	hsa-miR-103a-3p	AC016747.3
CCNG1	hsa-miR-103a-3p	CTD-2196E14.9
CCNG1	hsa-miR-103a-3p	DLX6-AS1
ATF3	hsa-miR-103a-3p	AC016747.3
ATF3	hsa-miR-103a-3p	CTD-2196E14.9
ATF3	hsa-miR-103a-3p	DLX6-AS1
APC	hsa-miR-103a-3p	AC016747.3
APC	hsa-miR-103a-3p	CTD-2196E14.9
APC	hsa-miR-103a-3p	DLX6-AS1
EGFR	hsa-miR-103a-3p	AC016747.3
EGFR	hsa-miR-103a-3p	CTD-2196E14.9
EGFR	hsa-miR-103a-3p	DLX6-AS1
EPT1	hsa-miR-103a-3p	AC016747.3
EPT1	hsa-miR-103a-3p	CTD-2196E14.9
EPT1	hsa-miR-103a-3p	DLX6-AS1
DOCK3	hsa-miR-103a-3p	AC016747.3
DOCK3	hsa-miR-103a-3p	CTD-2196E14.9
DOCK3	hsa-miR-103a-3p	DLX6-AS1
DEPDC1B	hsa-miR-103a-3p	AC016747.3
DEPDC1B	hsa-miR-103a-3p	CTD-2196E14.9
DEPDC1B	hsa-miR-103a-3p	DLX6-AS1
KANK1	hsa-miR-103a-3p	AC016747.3
KANK1	hsa-miR-103a-3p	CTD-2196E14.9
KANK1	hsa-miR-103a-3p	DLX6-AS1
ACVR2A	hsa-miR-103a-3p	AC016747.3
ACVR2A	hsa-miR-103a-3p	CTD-2196E14.9
ACVR2A	hsa-miR-103a-3p	DLX6-AS1
ATE1	hsa-miR-103a-3p	AC016747.3
ATE1	hsa-miR-103a-3p	CTD-2196E14.9
ATE1	hsa-miR-103a-3p	DLX6-AS1
CCDC66	hsa-miR-103a-3p	AC016747.3
CCDC66	hsa-miR-103a-3p	CTD-2196E14.9
CCDC66	hsa-miR-103a-3p	DLX6-AS1
AP3B1	hsa-miR-103a-3p	AC016747.3
AP3B1	hsa-miR-103a-3p	CTD-2196E14.9
AP3B1	hsa-miR-103a-3p	DLX6-AS1
ELP2	hsa-miR-103a-3p	AC016747.3
ELP2	hsa-miR-103a-3p	CTD-2196E14.9
ELP2	hsa-miR-103a-3p	DLX6-AS1
IRF2BP2	hsa-miR-103a-3p	AC016747.3
IRF2BP2	hsa-miR-103a-3p	CTD-2196E14.9
IRF2BP2	hsa-miR-103a-3p	DLX6-AS1
DDHD2	hsa-miR-103a-3p	AC016747.3
DDHD2	hsa-miR-103a-3p	CTD-2196E14.9
DDHD2	hsa-miR-103a-3p	DLX6-AS1
FNTA	hsa-miR-103a-3p	AC016747.3
FNTA	hsa-miR-103a-3p	CTD-2196E14.9
FNTA	hsa-miR-103a-3p	DLX6-AS1
COPB1	hsa-miR-103a-3p	AC016747.3
COPB1	hsa-miR-103a-3p	CTD-2196E14.9
COPB1	hsa-miR-103a-3p	DLX6-AS1
FAM46A	hsa-miR-103a-3p	AC016747.3
FAM46A	hsa-miR-103a-3p	CTD-2196E14.9
FAM46A	hsa-miR-103a-3p	DLX6-AS1
KATNB1	hsa-miR-103a-3p	AC016747.3
KATNB1	hsa-miR-103a-3p	CTD-2196E14.9
KATNB1	hsa-miR-103a-3p	DLX6-AS1
KCNK1	hsa-miR-103a-3p	AC016747.3
KCNK1	hsa-miR-103a-3p	CTD-2196E14.9
KCNK1	hsa-miR-103a-3p	DLX6-AS1
AFF2	hsa-miR-103a-3p	AC016747.3
AFF2	hsa-miR-103a-3p	CTD-2196E14.9
AFF2	hsa-miR-103a-3p	DLX6-AS1
ASXL1	hsa-miR-103a-3p	AC016747.3
ASXL1	hsa-miR-103a-3p	CTD-2196E14.9
ASXL1	hsa-miR-103a-3p	DLX6-AS1
DCUN1D4	hsa-miR-103a-3p	AC016747.3
DCUN1D4	hsa-miR-103a-3p	CTD-2196E14.9
DCUN1D4	hsa-miR-103a-3p	DLX6-AS1
FLNB	hsa-miR-103a-3p	AC016747.3
FLNB	hsa-miR-103a-3p	CTD-2196E14.9
FLNB	hsa-miR-103a-3p	DLX6-AS1
IGFBP1	hsa-miR-103a-3p	AC016747.3
IGFBP1	hsa-miR-103a-3p	CTD-2196E14.9
IGFBP1	hsa-miR-103a-3p	DLX6-AS1
ITGA6	hsa-miR-103a-3p	AC016747.3
ITGA6	hsa-miR-103a-3p	CTD-2196E14.9
ITGA6	hsa-miR-103a-3p	DLX6-AS1
IPO7	hsa-miR-103a-3p	AC016747.3
IPO7	hsa-miR-103a-3p	CTD-2196E14.9
IPO7	hsa-miR-103a-3p	DLX6-AS1
IQGAP1	hsa-miR-103a-3p	AC016747.3
IQGAP1	hsa-miR-103a-3p	CTD-2196E14.9
IQGAP1	hsa-miR-103a-3p	DLX6-AS1
EXOC5	hsa-miR-103a-3p	AC016747.3
EXOC5	hsa-miR-103a-3p	CTD-2196E14.9
EXOC5	hsa-miR-103a-3p	DLX6-AS1
CNOT6L	hsa-miR-103a-3p	AC016747.3
CNOT6L	hsa-miR-103a-3p	CTD-2196E14.9
CNOT6L	hsa-miR-103a-3p	DLX6-AS1
CNOT6	hsa-miR-103a-3p	AC016747.3
CNOT6	hsa-miR-103a-3p	CTD-2196E14.9
CNOT6	hsa-miR-103a-3p	DLX6-AS1
ARL6IP6	hsa-miR-103a-3p	AC016747.3
ARL6IP6	hsa-miR-103a-3p	CTD-2196E14.9
ARL6IP6	hsa-miR-103a-3p	DLX6-AS1
AFF4	hsa-miR-103a-3p	AC016747.3
AFF4	hsa-miR-103a-3p	CTD-2196E14.9
AFF4	hsa-miR-103a-3p	DLX6-AS1
ANKFY1	hsa-miR-103a-3p	AC016747.3
ANKFY1	hsa-miR-103a-3p	CTD-2196E14.9
ANKFY1	hsa-miR-103a-3p	DLX6-AS1
AGPAT2	hsa-miR-103a-3p	AC016747.3
AGPAT2	hsa-miR-103a-3p	CTD-2196E14.9
AGPAT2	hsa-miR-103a-3p	DLX6-AS1
EDIL3	hsa-miR-103a-3p	AC016747.3
EDIL3	hsa-miR-103a-3p	CTD-2196E14.9
EDIL3	hsa-miR-103a-3p	DLX6-AS1
DCUN1D3	hsa-miR-103a-3p	AC016747.3
DCUN1D3	hsa-miR-103a-3p	CTD-2196E14.9
DCUN1D3	hsa-miR-103a-3p	DLX6-AS1
DCTN2	hsa-miR-103a-3p	AC016747.3
DCTN2	hsa-miR-103a-3p	CTD-2196E14.9
DCTN2	hsa-miR-103a-3p	DLX6-AS1
IGSF3	hsa-miR-103a-3p	AC016747.3
IGSF3	hsa-miR-103a-3p	CTD-2196E14.9
IGSF3	hsa-miR-103a-3p	DLX6-AS1
FOSB	hsa-miR-103a-3p	AC016747.3
FOSB	hsa-miR-103a-3p	CTD-2196E14.9
FOSB	hsa-miR-103a-3p	DLX6-AS1
HELZ	hsa-miR-103a-3p	AC016747.3
HELZ	hsa-miR-103a-3p	CTD-2196E14.9
HELZ	hsa-miR-103a-3p	DLX6-AS1
IQSEC1	hsa-miR-103a-3p	AC016747.3
IQSEC1	hsa-miR-103a-3p	CTD-2196E14.9
IQSEC1	hsa-miR-103a-3p	DLX6-AS1
DOCK9	hsa-miR-103a-3p	AC016747.3
DOCK9	hsa-miR-103a-3p	CTD-2196E14.9
DOCK9	hsa-miR-103a-3p	DLX6-AS1
AQP11	hsa-miR-103a-3p	AC016747.3
AQP11	hsa-miR-103a-3p	CTD-2196E14.9
AQP11	hsa-miR-103a-3p	DLX6-AS1
CMBL	hsa-miR-103a-3p	AC016747.3
CMBL	hsa-miR-103a-3p	CTD-2196E14.9
CMBL	hsa-miR-103a-3p	DLX6-AS1
COPS2	hsa-miR-103a-3p	AC016747.3
COPS2	hsa-miR-103a-3p	CTD-2196E14.9
COPS2	hsa-miR-103a-3p	DLX6-AS1
ARNT	hsa-miR-103a-3p	AC016747.3
ARNT	hsa-miR-103a-3p	CTD-2196E14.9
ARNT	hsa-miR-103a-3p	DLX6-AS1
FCF1	hsa-miR-103a-3p	AC016747.3
FCF1	hsa-miR-103a-3p	CTD-2196E14.9
FCF1	hsa-miR-103a-3p	DLX6-AS1
FKBP14	hsa-miR-103a-3p	AC016747.3
FKBP14	hsa-miR-103a-3p	CTD-2196E14.9
FKBP14	hsa-miR-103a-3p	DLX6-AS1
CCND1	hsa-miR-103a-3p	AC016747.3
CCND1	hsa-miR-103a-3p	CTD-2196E14.9
CCND1	hsa-miR-103a-3p	DLX6-AS1
DPY19L4	hsa-miR-103a-3p	AC016747.3
DPY19L4	hsa-miR-103a-3p	CTD-2196E14.9
DPY19L4	hsa-miR-103a-3p	DLX6-AS1
HSPA9	hsa-miR-103a-3p	AC016747.3
HSPA9	hsa-miR-103a-3p	CTD-2196E14.9
HSPA9	hsa-miR-103a-3p	DLX6-AS1
HIGD1A	hsa-miR-103a-3p	AC016747.3
HIGD1A	hsa-miR-103a-3p	CTD-2196E14.9
HIGD1A	hsa-miR-103a-3p	DLX6-AS1
HIATL1	hsa-miR-103a-3p	AC016747.3
HIATL1	hsa-miR-103a-3p	CTD-2196E14.9
HIATL1	hsa-miR-103a-3p	DLX6-AS1
ATF7	hsa-miR-103a-3p	AC016747.3
ATF7	hsa-miR-103a-3p	CTD-2196E14.9
ATF7	hsa-miR-103a-3p	DLX6-AS1
CDC42SE2	hsa-miR-103a-3p	AC016747.3
CDC42SE2	hsa-miR-103a-3p	CTD-2196E14.9
CDC42SE2	hsa-miR-103a-3p	DLX6-AS1
CDYL	hsa-miR-103a-3p	AC016747.3
CDYL	hsa-miR-103a-3p	CTD-2196E14.9
CDYL	hsa-miR-103a-3p	DLX6-AS1
FAM13B	hsa-miR-103a-3p	AC016747.3
FAM13B	hsa-miR-103a-3p	CTD-2196E14.9
FAM13B	hsa-miR-103a-3p	DLX6-AS1
AKAP1	hsa-miR-103a-3p	AC016747.3
AKAP1	hsa-miR-103a-3p	CTD-2196E14.9
AKAP1	hsa-miR-103a-3p	DLX6-AS1
AKAP2	hsa-miR-103a-3p	AC016747.3
AKAP2	hsa-miR-103a-3p	CTD-2196E14.9
AKAP2	hsa-miR-103a-3p	DLX6-AS1
AFG3L2	hsa-miR-103a-3p	AC016747.3
AFG3L2	hsa-miR-103a-3p	CTD-2196E14.9
AFG3L2	hsa-miR-103a-3p	DLX6-AS1
ADARB1	hsa-miR-103a-3p	AC016747.3
ADARB1	hsa-miR-103a-3p	CTD-2196E14.9
ADARB1	hsa-miR-103a-3p	DLX6-AS1
DYNLT3	hsa-miR-103a-3p	AC016747.3
DYNLT3	hsa-miR-103a-3p	CTD-2196E14.9
DYNLT3	hsa-miR-103a-3p	DLX6-AS1
BZW2	hsa-miR-103a-3p	AC016747.3
BZW2	hsa-miR-103a-3p	CTD-2196E14.9
BZW2	hsa-miR-103a-3p	DLX6-AS1
DCLRE1B	hsa-miR-103a-3p	AC016747.3
DCLRE1B	hsa-miR-103a-3p	CTD-2196E14.9
DCLRE1B	hsa-miR-103a-3p	DLX6-AS1
CUL5	hsa-miR-103a-3p	AC016747.3
CUL5	hsa-miR-103a-3p	CTD-2196E14.9
CUL5	hsa-miR-103a-3p	DLX6-AS1
HSD17B12	hsa-miR-103a-3p	AC016747.3
HSD17B12	hsa-miR-103a-3p	CTD-2196E14.9
HSD17B12	hsa-miR-103a-3p	DLX6-AS1
GPHN	hsa-miR-103a-3p	AC016747.3
GPHN	hsa-miR-103a-3p	CTD-2196E14.9
GPHN	hsa-miR-103a-3p	DLX6-AS1
FOXC1	hsa-miR-103a-3p	AC016747.3
FOXC1	hsa-miR-103a-3p	CTD-2196E14.9
FOXC1	hsa-miR-103a-3p	DLX6-AS1
C10orf76	hsa-miR-103a-3p	AC016747.3
C10orf76	hsa-miR-103a-3p	CTD-2196E14.9
C10orf76	hsa-miR-103a-3p	DLX6-AS1
EXOC8	hsa-miR-103a-3p	AC016747.3
EXOC8	hsa-miR-103a-3p	CTD-2196E14.9
EXOC8	hsa-miR-103a-3p	DLX6-AS1
CMTM6	hsa-miR-103a-3p	AC016747.3
CMTM6	hsa-miR-103a-3p	CTD-2196E14.9
CMTM6	hsa-miR-103a-3p	DLX6-AS1
CKS1B	hsa-miR-103a-3p	AC016747.3
CKS1B	hsa-miR-103a-3p	CTD-2196E14.9
CKS1B	hsa-miR-103a-3p	DLX6-AS1
CCL1	hsa-miR-103a-3p	AC016747.3
CCL1	hsa-miR-103a-3p	CTD-2196E14.9
CCL1	hsa-miR-103a-3p	DLX6-AS1
DSCR3	hsa-miR-103a-3p	AC016747.3
DSCR3	hsa-miR-103a-3p	CTD-2196E14.9
DSCR3	hsa-miR-103a-3p	DLX6-AS1
C11orf24	hsa-miR-103a-3p	AC016747.3
C11orf24	hsa-miR-103a-3p	CTD-2196E14.9
C11orf24	hsa-miR-103a-3p	DLX6-AS1
GMFB	hsa-miR-103a-3p	AC016747.3
GMFB	hsa-miR-103a-3p	CTD-2196E14.9
GMFB	hsa-miR-103a-3p	DLX6-AS1
CHD1	hsa-miR-103a-3p	AC016747.3
CHD1	hsa-miR-103a-3p	CTD-2196E14.9
CHD1	hsa-miR-103a-3p	DLX6-AS1
IFT52	hsa-miR-103a-3p	AC016747.3
IFT52	hsa-miR-103a-3p	CTD-2196E14.9
IFT52	hsa-miR-103a-3p	DLX6-AS1
IFNAR1	hsa-miR-103a-3p	AC016747.3
IFNAR1	hsa-miR-103a-3p	CTD-2196E14.9
IFNAR1	hsa-miR-103a-3p	DLX6-AS1
GPCPD1	hsa-miR-103a-3p	AC016747.3
GPCPD1	hsa-miR-103a-3p	CTD-2196E14.9
GPCPD1	hsa-miR-103a-3p	DLX6-AS1
GDAP1L1	hsa-miR-103a-3p	AC016747.3
GDAP1L1	hsa-miR-103a-3p	CTD-2196E14.9
GDAP1L1	hsa-miR-103a-3p	DLX6-AS1
BTAF1	hsa-miR-103a-3p	AC016747.3
BTAF1	hsa-miR-103a-3p	CTD-2196E14.9
BTAF1	hsa-miR-103a-3p	DLX6-AS1
BTLA	hsa-miR-103a-3p	AC016747.3
BTLA	hsa-miR-103a-3p	CTD-2196E14.9
BTLA	hsa-miR-103a-3p	DLX6-AS1
CHRNA5	hsa-miR-103a-3p	AC016747.3
CHRNA5	hsa-miR-103a-3p	CTD-2196E14.9
CHRNA5	hsa-miR-103a-3p	DLX6-AS1
ID2	hsa-miR-103a-3p	AC016747.3
ID2	hsa-miR-103a-3p	CTD-2196E14.9
ID2	hsa-miR-103a-3p	DLX6-AS1
CREBL2	hsa-miR-103a-3p	AC016747.3
CREBL2	hsa-miR-103a-3p	CTD-2196E14.9
CREBL2	hsa-miR-103a-3p	DLX6-AS1
GOLT1B	hsa-miR-103a-3p	AC016747.3
GOLT1B	hsa-miR-103a-3p	CTD-2196E14.9
GOLT1B	hsa-miR-103a-3p	DLX6-AS1
CREB5	hsa-miR-103a-3p	AC016747.3
CREB5	hsa-miR-103a-3p	CTD-2196E14.9
CREB5	hsa-miR-103a-3p	DLX6-AS1
GIT2	hsa-miR-103a-3p	AC016747.3
GIT2	hsa-miR-103a-3p	CTD-2196E14.9
GIT2	hsa-miR-103a-3p	DLX6-AS1
ATP6V1C1	hsa-miR-103a-3p	AC016747.3
ATP6V1C1	hsa-miR-103a-3p	CTD-2196E14.9
ATP6V1C1	hsa-miR-103a-3p	DLX6-AS1
BCAT2	hsa-miR-103a-3p	AC016747.3
BCAT2	hsa-miR-103a-3p	CTD-2196E14.9
BCAT2	hsa-miR-103a-3p	DLX6-AS1
CTNND1	hsa-miR-103a-3p	AC016747.3
CTNND1	hsa-miR-103a-3p	CTD-2196E14.9
CTNND1	hsa-miR-103a-3p	DLX6-AS1
BICD1	hsa-miR-103a-3p	AC016747.3
BICD1	hsa-miR-103a-3p	CTD-2196E14.9
BICD1	hsa-miR-103a-3p	DLX6-AS1
GALNT7	hsa-miR-103a-3p	AC016747.3
GALNT7	hsa-miR-103a-3p	CTD-2196E14.9
GALNT7	hsa-miR-103a-3p	DLX6-AS1
FOXJ3	hsa-miR-103a-3p	AC016747.3
FOXJ3	hsa-miR-103a-3p	CTD-2196E14.9
FOXJ3	hsa-miR-103a-3p	DLX6-AS1
BTG2	hsa-miR-103a-3p	AC016747.3
BTG2	hsa-miR-103a-3p	CTD-2196E14.9
BTG2	hsa-miR-103a-3p	DLX6-AS1
CREG1	hsa-miR-103a-3p	AC016747.3
CREG1	hsa-miR-103a-3p	CTD-2196E14.9
CREG1	hsa-miR-103a-3p	DLX6-AS1
CPEB3	hsa-miR-103a-3p	AC016747.3
CPEB3	hsa-miR-103a-3p	CTD-2196E14.9
CPEB3	hsa-miR-103a-3p	DLX6-AS1
COPS7A	hsa-miR-103a-3p	AC016747.3
COPS7A	hsa-miR-103a-3p	CTD-2196E14.9
COPS7A	hsa-miR-103a-3p	DLX6-AS1
ABI1	hsa-miR-106b-5p	AC105760.2
ABCD2	hsa-miR-106b-5p	AC105760.2
FGD1	hsa-miR-106b-5p	AC105760.2
CHD5	hsa-miR-106b-5p	AC105760.2
FEM1C	hsa-miR-106b-5p	AC105760.2
ARL13B	hsa-miR-106b-5p	AC105760.2
ATP11A	hsa-miR-106b-5p	AC105760.2
FOXG1	hsa-miR-106b-5p	AC105760.2
GALNT3	hsa-miR-106b-5p	AC105760.2
ARSJ	hsa-miR-106b-5p	AC105760.2
ABCC5	hsa-miR-106b-5p	AC105760.2
FBXO45	hsa-miR-106b-5p	AC105760.2
CUL4B	hsa-miR-106b-5p	AC105760.2
ASXL2	hsa-miR-106b-5p	AC105760.2
CDS2	hsa-miR-106b-5p	AC105760.2
DCUN1D3	hsa-miR-106b-5p	AC105760.2
AP3D1	hsa-miR-106b-5p	AC105760.2
COQ10B	hsa-miR-106b-5p	AC105760.2
ABL2	hsa-miR-106b-5p	AC105760.2
ARID5B	hsa-miR-106b-5p	AC105760.2
CDC37L1	hsa-miR-106b-5p	AC105760.2
IFIT1	hsa-miR-106b-5p	AC105760.2
FURIN	hsa-miR-106b-5p	AC105760.2
GABPB1	hsa-miR-106b-5p	AC105760.2
ADAR	hsa-miR-106b-5p	AC105760.2
INPP5F	hsa-miR-106b-5p	AC105760.2
IFNAR2	hsa-miR-106b-5p	AC105760.2
CLIC4	hsa-miR-106b-5p	AC105760.2
ARHGEF3	hsa-miR-106b-5p	AC105760.2
BBX	hsa-miR-106b-5p	AC105760.2
ANKRD52	hsa-miR-106b-5p	AC105760.2
COG5	hsa-miR-106b-5p	AC105760.2
CDKN1A	hsa-miR-106b-5p	AC105760.2
CCDC6	hsa-miR-106b-5p	AC105760.2
HIPK3	hsa-miR-106b-5p	AC105760.2
FXN	hsa-miR-106b-5p	AC105760.2
IFRD2	hsa-miR-106b-5p	AC105760.2
DCBLD2	hsa-miR-106b-5p	AC105760.2
DCAF12	hsa-miR-106b-5p	AC105760.2
DIP2B	hsa-miR-106b-5p	AC105760.2
APBB2	hsa-miR-106b-5p	AC105760.2
JAZF1	hsa-miR-106b-5p	AC105760.2
JAK1	hsa-miR-106b-5p	AC105760.2
DNAJC8	hsa-miR-106b-5p	AC105760.2
BCL2L11	hsa-miR-106b-5p	AC105760.2
GNS	hsa-miR-106b-5p	AC105760.2
FAM168A	hsa-miR-106b-5p	AC105760.2
GOLM1	hsa-miR-106b-5p	AC105760.2
HIST1H2BD	hsa-miR-106b-5p	AC105760.2
GATA6	hsa-miR-106b-5p	AC105760.2
IL1RAP	hsa-miR-106b-5p	AC105760.2
FIBIN	hsa-miR-106b-5p	AC105760.2
GLA	hsa-miR-106b-5p	AC105760.2
ATXN7L1	hsa-miR-106b-5p	AC105760.2
B4GALT5	hsa-miR-106b-5p	AC105760.2
DNAH10	hsa-miR-106b-5p	AC105760.2
AHRR	hsa-miR-106b-5p	AC105760.2
FOXF2	hsa-miR-106b-5p	AC105760.2
IRF9	hsa-miR-106b-5p	AC105760.2
CAPRIN2	hsa-miR-106b-5p	AC105760.2
FAM60A	hsa-miR-106b-5p	AC105760.2
BICD1	hsa-miR-106b-5p	AC105760.2
ICMT	hsa-miR-106b-5p	AC105760.2
FGD4	hsa-miR-106b-5p	AC105760.2
ATL2	hsa-miR-106b-5p	AC105760.2
FNDC3B	hsa-miR-106b-5p	AC105760.2
IQGAP1	hsa-miR-106b-5p	AC105760.2
APCDD1	hsa-miR-106b-5p	AC105760.2
ITGA4	hsa-miR-106b-5p	AC105760.2
GNL3L	hsa-miR-106b-5p	AC105760.2
GNPDA2	hsa-miR-106b-5p	AC105760.2
FAM3C	hsa-miR-106b-5p	AC105760.2
FOLR1	hsa-miR-106b-5p	AC105760.2
FAM45A	hsa-miR-106b-5p	AC105760.2
HBS1L	hsa-miR-106b-5p	AC105760.2
GPCPD1	hsa-miR-106b-5p	AC105760.2
FZD7	hsa-miR-106b-5p	AC105760.2
IKBIP	hsa-miR-106b-5p	AC105760.2
CTBP2	hsa-miR-106b-5p	AC105760.2
CSTF3	hsa-miR-106b-5p	AC105760.2
DMTF1	hsa-miR-106b-5p	AC105760.2
GMFB	hsa-miR-106b-5p	AC105760.2
ISM2	hsa-miR-106b-5p	AC105760.2
FOXD1	hsa-miR-106b-5p	AC105760.2
AFF4	hsa-miR-106b-5p	AC105760.2
C19orf47	hsa-miR-106b-5p	AC105760.2
F3	hsa-miR-106b-5p	AC105760.2
FAM189A1	hsa-miR-106b-5p	AC105760.2
HADHA	hsa-miR-106b-5p	AC105760.2
HACE1	hsa-miR-106b-5p	AC105760.2
DNMT3B	hsa-miR-106b-5p	AC105760.2
IKZF4	hsa-miR-106b-5p	AC105760.2
GIT2	hsa-miR-106b-5p	AC105760.2
FNIP1	hsa-miR-106b-5p	AC105760.2
CRTC3	hsa-miR-106b-5p	AC105760.2
ADIPOR1	hsa-miR-106b-5p	AC105760.2
FOXC1	hsa-miR-106b-5p	AC105760.2
IRF1	hsa-miR-106b-5p	AC105760.2
C6orf62	hsa-miR-106b-5p	AC105760.2
ERAP1	hsa-miR-106b-5p	AC105760.2
FAM160B1	hsa-miR-106b-5p	AC105760.2
HIF1AN	hsa-miR-106b-5p	AC105760.2
EYA1	hsa-miR-106b-5p	AC105760.2
EDNRA	hsa-miR-106b-5p	AC105760.2
GINS1	hsa-miR-106b-5p	AC105760.2
CSGALNACT1	hsa-miR-106b-5p	AC105760.2
CSRP1	hsa-miR-106b-5p	AC105760.2
C9orf40	hsa-miR-106b-5p	AC105760.2
C9orf72	hsa-miR-106b-5p	AC105760.2
CAND1	hsa-miR-106b-5p	AC105760.2
CACNB4	hsa-miR-106b-5p	AC105760.2
GTF2H1	hsa-miR-106b-5p	AC105760.2
C19orf12	hsa-miR-106b-5p	AC105760.2
EZH2	hsa-miR-106b-5p	AC105760.2
FAM129B	hsa-miR-106b-5p	AC105760.2
DUSP22	hsa-miR-106b-5p	AC105760.2
C10orf76	hsa-miR-106b-5p	AC105760.2
C11orf30	hsa-miR-106b-5p	AC105760.2
C3orf70	hsa-miR-106b-5p	AC105760.2
CPA3	hsa-miR-106b-5p	AC105760.2
GPR137B	hsa-miR-106b-5p	AC105760.2
C18orf54	hsa-miR-106b-5p	AC105760.2
EIF5A2	hsa-miR-106b-5p	AC105760.2
DPYSL2	hsa-miR-106b-5p	AC105760.2
GPR37	hsa-miR-106b-5p	AC105760.2
BMP6	hsa-miR-106b-5p	AC105760.2
BTBD10	hsa-miR-106b-5p	AC105760.2
EPAS1	hsa-miR-106b-5p	AC105760.2
DOCK9	hsa-miR-106b-5p	AC105760.2
BTG3	hsa-miR-106b-5p	AC105760.2
EFNA3	hsa-miR-106b-5p	AC105760.2
DOCK7	hsa-miR-106b-5p	AC105760.2
DPY19L4	hsa-miR-107	AC016747.3
DPY19L4	hsa-miR-107	CTD-2196E14.9
DPY19L4	hsa-miR-107	DLX6-AS1
AP2A1	hsa-miR-107	AC016747.3
AP2A1	hsa-miR-107	CTD-2196E14.9
AP2A1	hsa-miR-107	DLX6-AS1
FBXO10	hsa-miR-107	AC016747.3
FBXO10	hsa-miR-107	CTD-2196E14.9
FBXO10	hsa-miR-107	DLX6-AS1
IL6	hsa-miR-107	AC016747.3
IL6	hsa-miR-107	CTD-2196E14.9
IL6	hsa-miR-107	DLX6-AS1
FAM92A1	hsa-miR-107	AC016747.3
FAM92A1	hsa-miR-107	CTD-2196E14.9
FAM92A1	hsa-miR-107	DLX6-AS1
C11orf24	hsa-miR-107	AC016747.3
C11orf24	hsa-miR-107	CTD-2196E14.9
C11orf24	hsa-miR-107	DLX6-AS1
AKAP2	hsa-miR-107	AC016747.3
AKAP2	hsa-miR-107	CTD-2196E14.9
AKAP2	hsa-miR-107	DLX6-AS1
EXOC8	hsa-miR-107	AC016747.3
EXOC8	hsa-miR-107	CTD-2196E14.9
EXOC8	hsa-miR-107	DLX6-AS1
CNOT6L	hsa-miR-107	AC016747.3
CNOT6L	hsa-miR-107	CTD-2196E14.9
CNOT6L	hsa-miR-107	DLX6-AS1
C10orf76	hsa-miR-107	AC016747.3
C10orf76	hsa-miR-107	CTD-2196E14.9
C10orf76	hsa-miR-107	DLX6-AS1
EXT2	hsa-miR-107	AC016747.3
EXT2	hsa-miR-107	CTD-2196E14.9
EXT2	hsa-miR-107	DLX6-AS1
KATNB1	hsa-miR-107	AC016747.3
KATNB1	hsa-miR-107	CTD-2196E14.9
KATNB1	hsa-miR-107	DLX6-AS1
ALAD	hsa-miR-107	AC016747.3
ALAD	hsa-miR-107	CTD-2196E14.9
ALAD	hsa-miR-107	DLX6-AS1
ANKFY1	hsa-miR-107	AC016747.3
ANKFY1	hsa-miR-107	CTD-2196E14.9
ANKFY1	hsa-miR-107	DLX6-AS1
CMTM6	hsa-miR-107	AC016747.3
CMTM6	hsa-miR-107	CTD-2196E14.9
CMTM6	hsa-miR-107	DLX6-AS1
IGFBP1	hsa-miR-107	AC016747.3
IGFBP1	hsa-miR-107	CTD-2196E14.9
IGFBP1	hsa-miR-107	DLX6-AS1
C15orf40	hsa-miR-107	AC016747.3
C15orf40	hsa-miR-107	CTD-2196E14.9
C15orf40	hsa-miR-107	DLX6-AS1
AKAP1	hsa-miR-107	AC016747.3
AKAP1	hsa-miR-107	CTD-2196E14.9
AKAP1	hsa-miR-107	DLX6-AS1
EXOC5	hsa-miR-107	AC016747.3
EXOC5	hsa-miR-107	CTD-2196E14.9
EXOC5	hsa-miR-107	DLX6-AS1
CCDC66	hsa-miR-107	AC016747.3
CCDC66	hsa-miR-107	CTD-2196E14.9
CCDC66	hsa-miR-107	DLX6-AS1
CCL1	hsa-miR-107	AC016747.3
CCL1	hsa-miR-107	CTD-2196E14.9
CCL1	hsa-miR-107	DLX6-AS1
BZW2	hsa-miR-107	AC016747.3
BZW2	hsa-miR-107	CTD-2196E14.9
BZW2	hsa-miR-107	DLX6-AS1
DOCK9	hsa-miR-107	AC016747.3
DOCK9	hsa-miR-107	CTD-2196E14.9
DOCK9	hsa-miR-107	DLX6-AS1
IGSF3	hsa-miR-107	AC016747.3
IGSF3	hsa-miR-107	CTD-2196E14.9
IGSF3	hsa-miR-107	DLX6-AS1
CCND1	hsa-miR-107	AC016747.3
CCND1	hsa-miR-107	CTD-2196E14.9
CCND1	hsa-miR-107	DLX6-AS1
IPO7	hsa-miR-107	AC016747.3
IPO7	hsa-miR-107	CTD-2196E14.9
IPO7	hsa-miR-107	DLX6-AS1
C19orf12	hsa-miR-107	AC016747.3
C19orf12	hsa-miR-107	CTD-2196E14.9
C19orf12	hsa-miR-107	DLX6-AS1
KCNH2	hsa-miR-107	AC016747.3
KCNH2	hsa-miR-107	CTD-2196E14.9
KCNH2	hsa-miR-107	DLX6-AS1
COL19A1	hsa-miR-107	AC016747.3
COL19A1	hsa-miR-107	CTD-2196E14.9
COL19A1	hsa-miR-107	DLX6-AS1
AP3B1	hsa-miR-107	AC016747.3
AP3B1	hsa-miR-107	CTD-2196E14.9
AP3B1	hsa-miR-107	DLX6-AS1
AFG3L2	hsa-miR-107	AC016747.3
AFG3L2	hsa-miR-107	CTD-2196E14.9
AFG3L2	hsa-miR-107	DLX6-AS1
EPT1	hsa-miR-107	AC016747.3
EPT1	hsa-miR-107	CTD-2196E14.9
EPT1	hsa-miR-107	DLX6-AS1
COPS7A	hsa-miR-107	AC016747.3
COPS7A	hsa-miR-107	CTD-2196E14.9
COPS7A	hsa-miR-107	DLX6-AS1
CAMKK2	hsa-miR-107	AC016747.3
CAMKK2	hsa-miR-107	CTD-2196E14.9
CAMKK2	hsa-miR-107	DLX6-AS1
FNTA	hsa-miR-107	AC016747.3
FNTA	hsa-miR-107	CTD-2196E14.9
FNTA	hsa-miR-107	DLX6-AS1
COPS8	hsa-miR-107	AC016747.3
COPS8	hsa-miR-107	CTD-2196E14.9
COPS8	hsa-miR-107	DLX6-AS1
IDI1	hsa-miR-107	AC016747.3
IDI1	hsa-miR-107	CTD-2196E14.9
IDI1	hsa-miR-107	DLX6-AS1
IFT52	hsa-miR-107	AC016747.3
IFT52	hsa-miR-107	CTD-2196E14.9
IFT52	hsa-miR-107	DLX6-AS1
CCNG1	hsa-miR-107	AC016747.3
CCNG1	hsa-miR-107	CTD-2196E14.9
CCNG1	hsa-miR-107	DLX6-AS1
DSCR3	hsa-miR-107	AC016747.3
DSCR3	hsa-miR-107	CTD-2196E14.9
DSCR3	hsa-miR-107	DLX6-AS1
CNOT6	hsa-miR-107	AC016747.3
CNOT6	hsa-miR-107	CTD-2196E14.9
CNOT6	hsa-miR-107	DLX6-AS1
CMBL	hsa-miR-107	AC016747.3
CMBL	hsa-miR-107	CTD-2196E14.9
CMBL	hsa-miR-107	DLX6-AS1
KCNK1	hsa-miR-107	AC016747.3
KCNK1	hsa-miR-107	CTD-2196E14.9
KCNK1	hsa-miR-107	DLX6-AS1
APC	hsa-miR-107	AC016747.3
APC	hsa-miR-107	CTD-2196E14.9
APC	hsa-miR-107	DLX6-AS1
APLN	hsa-miR-107	AC016747.3
APLN	hsa-miR-107	CTD-2196E14.9
APLN	hsa-miR-107	DLX6-AS1
ACP2	hsa-miR-107	AC016747.3
ACP2	hsa-miR-107	CTD-2196E14.9
ACP2	hsa-miR-107	DLX6-AS1
APOOL	hsa-miR-107	AC016747.3
APOOL	hsa-miR-107	CTD-2196E14.9
APOOL	hsa-miR-107	DLX6-AS1
CAMKK1	hsa-miR-107	AC016747.3
CAMKK1	hsa-miR-107	CTD-2196E14.9
CAMKK1	hsa-miR-107	DLX6-AS1
BTG2	hsa-miR-107	AC016747.3
BTG2	hsa-miR-107	CTD-2196E14.9
BTG2	hsa-miR-107	DLX6-AS1
FOSB	hsa-miR-107	AC016747.3
FOSB	hsa-miR-107	CTD-2196E14.9
FOSB	hsa-miR-107	DLX6-AS1
FOXJ3	hsa-miR-107	AC016747.3
FOXJ3	hsa-miR-107	CTD-2196E14.9
FOXJ3	hsa-miR-107	DLX6-AS1
HNRNPH3	hsa-miR-107	AC016747.3
HNRNPH3	hsa-miR-107	CTD-2196E14.9
HNRNPH3	hsa-miR-107	DLX6-AS1
COQ10A	hsa-miR-107	AC016747.3
COQ10A	hsa-miR-107	CTD-2196E14.9
COQ10A	hsa-miR-107	DLX6-AS1
DYNLT3	hsa-miR-107	AC016747.3
DYNLT3	hsa-miR-107	CTD-2196E14.9
DYNLT3	hsa-miR-107	DLX6-AS1
EDIL3	hsa-miR-107	AC016747.3
EDIL3	hsa-miR-107	CTD-2196E14.9
EDIL3	hsa-miR-107	DLX6-AS1
FCF1	hsa-miR-107	AC016747.3
FCF1	hsa-miR-107	CTD-2196E14.9
FCF1	hsa-miR-107	DLX6-AS1
COPB1	hsa-miR-107	AC016747.3
COPB1	hsa-miR-107	CTD-2196E14.9
COPB1	hsa-miR-107	DLX6-AS1
ACVR2A	hsa-miR-107	AC016747.3
ACVR2A	hsa-miR-107	CTD-2196E14.9
ACVR2A	hsa-miR-107	DLX6-AS1
FKBP14	hsa-miR-107	AC016747.3
FKBP14	hsa-miR-107	CTD-2196E14.9
FKBP14	hsa-miR-107	DLX6-AS1
FLNB	hsa-miR-107	AC016747.3
FLNB	hsa-miR-107	CTD-2196E14.9
FLNB	hsa-miR-107	DLX6-AS1
C6orf62	hsa-miR-107	AC016747.3
C6orf62	hsa-miR-107	CTD-2196E14.9
C6orf62	hsa-miR-107	DLX6-AS1
ATF7	hsa-miR-107	AC016747.3
ATF7	hsa-miR-107	CTD-2196E14.9
ATF7	hsa-miR-107	DLX6-AS1
DOCK3	hsa-miR-107	AC016747.3
DOCK3	hsa-miR-107	CTD-2196E14.9
DOCK3	hsa-miR-107	DLX6-AS1
DCTN2	hsa-miR-107	AC016747.3
DCTN2	hsa-miR-107	CTD-2196E14.9
DCTN2	hsa-miR-107	DLX6-AS1
DCUN1D3	hsa-miR-107	AC016747.3
DCUN1D3	hsa-miR-107	CTD-2196E14.9
DCUN1D3	hsa-miR-107	DLX6-AS1
HIGD1A	hsa-miR-107	AC016747.3
HIGD1A	hsa-miR-107	CTD-2196E14.9
HIGD1A	hsa-miR-107	DLX6-AS1
IQGAP1	hsa-miR-107	AC016747.3
IQGAP1	hsa-miR-107	CTD-2196E14.9
IQGAP1	hsa-miR-107	DLX6-AS1
CLIP1	hsa-miR-107	AC016747.3
CLIP1	hsa-miR-107	CTD-2196E14.9
CLIP1	hsa-miR-107	DLX6-AS1
IREB2	hsa-miR-107	AC016747.3
IREB2	hsa-miR-107	CTD-2196E14.9
IREB2	hsa-miR-107	DLX6-AS1
EFNA3	hsa-miR-107	AC016747.3
EFNA3	hsa-miR-107	CTD-2196E14.9
EFNA3	hsa-miR-107	DLX6-AS1
COPS2	hsa-miR-107	AC016747.3
COPS2	hsa-miR-107	CTD-2196E14.9
COPS2	hsa-miR-107	DLX6-AS1
ELP2	hsa-miR-107	AC016747.3
ELP2	hsa-miR-107	CTD-2196E14.9
ELP2	hsa-miR-107	DLX6-AS1
ENSA	hsa-miR-107	AC016747.3
ENSA	hsa-miR-107	CTD-2196E14.9
ENSA	hsa-miR-107	DLX6-AS1
BAZ1A	hsa-miR-107	AC016747.3
BAZ1A	hsa-miR-107	CTD-2196E14.9
BAZ1A	hsa-miR-107	DLX6-AS1
ASXL1	hsa-miR-107	AC016747.3
ASXL1	hsa-miR-107	CTD-2196E14.9
ASXL1	hsa-miR-107	DLX6-AS1
BTAF1	hsa-miR-107	AC016747.3
BTAF1	hsa-miR-107	CTD-2196E14.9
BTAF1	hsa-miR-107	DLX6-AS1
DNAJB2	hsa-miR-107	AC016747.3
DNAJB2	hsa-miR-107	CTD-2196E14.9
DNAJB2	hsa-miR-107	DLX6-AS1
DHRS4L2	hsa-miR-107	AC016747.3
DHRS4L2	hsa-miR-107	CTD-2196E14.9
DHRS4L2	hsa-miR-107	DLX6-AS1
HSPA9	hsa-miR-107	AC016747.3
HSPA9	hsa-miR-107	CTD-2196E14.9
HSPA9	hsa-miR-107	DLX6-AS1
DCLRE1B	hsa-miR-107	AC016747.3
DCLRE1B	hsa-miR-107	CTD-2196E14.9
DCLRE1B	hsa-miR-107	DLX6-AS1
IQSEC1	hsa-miR-107	AC016747.3
IQSEC1	hsa-miR-107	CTD-2196E14.9
IQSEC1	hsa-miR-107	DLX6-AS1
CHD6	hsa-miR-107	AC016747.3
CHD6	hsa-miR-107	CTD-2196E14.9
CHD6	hsa-miR-107	DLX6-AS1
CKS1B	hsa-miR-107	AC016747.3
CKS1B	hsa-miR-107	CTD-2196E14.9
CKS1B	hsa-miR-107	DLX6-AS1
ADARB1	hsa-miR-107	AC016747.3
ADARB1	hsa-miR-107	CTD-2196E14.9
ADARB1	hsa-miR-107	DLX6-AS1
KANK1	hsa-miR-107	AC016747.3
KANK1	hsa-miR-107	CTD-2196E14.9
KANK1	hsa-miR-107	DLX6-AS1
EGFR	hsa-miR-107	AC016747.3
EGFR	hsa-miR-107	CTD-2196E14.9
EGFR	hsa-miR-107	DLX6-AS1
ATP6V1C1	hsa-miR-107	AC016747.3
ATP6V1C1	hsa-miR-107	CTD-2196E14.9
ATP6V1C1	hsa-miR-107	DLX6-AS1
GDAP1L1	hsa-miR-107	AC016747.3
GDAP1L1	hsa-miR-107	CTD-2196E14.9
GDAP1L1	hsa-miR-107	DLX6-AS1
BICD1	hsa-miR-107	AC016747.3
BICD1	hsa-miR-107	CTD-2196E14.9
BICD1	hsa-miR-107	DLX6-AS1
DNAJB14	hsa-miR-107	AC016747.3
DNAJB14	hsa-miR-107	CTD-2196E14.9
DNAJB14	hsa-miR-107	DLX6-AS1
DEPDC1B	hsa-miR-107	AC016747.3
DEPDC1B	hsa-miR-107	CTD-2196E14.9
DEPDC1B	hsa-miR-107	DLX6-AS1
DCUN1D4	hsa-miR-107	AC016747.3
DCUN1D4	hsa-miR-107	CTD-2196E14.9
DCUN1D4	hsa-miR-107	DLX6-AS1
CTNND1	hsa-miR-107	AC016747.3
CTNND1	hsa-miR-107	CTD-2196E14.9
CTNND1	hsa-miR-107	DLX6-AS1
CDC42SE2	hsa-miR-107	AC016747.3
CDC42SE2	hsa-miR-107	CTD-2196E14.9
CDC42SE2	hsa-miR-107	DLX6-AS1
HIATL1	hsa-miR-107	AC016747.3
HIATL1	hsa-miR-107	CTD-2196E14.9
HIATL1	hsa-miR-107	DLX6-AS1
CHD1	hsa-miR-107	AC016747.3
CHD1	hsa-miR-107	CTD-2196E14.9
CHD1	hsa-miR-107	DLX6-AS1
ITGA6	hsa-miR-107	AC016747.3
ITGA6	hsa-miR-107	CTD-2196E14.9
ITGA6	hsa-miR-107	DLX6-AS1
ARNT	hsa-miR-107	AC016747.3
ARNT	hsa-miR-107	CTD-2196E14.9
ARNT	hsa-miR-107	DLX6-AS1
C1GALT1	hsa-miR-107	AC016747.3
C1GALT1	hsa-miR-107	CTD-2196E14.9
C1GALT1	hsa-miR-107	DLX6-AS1
GOLT1B	hsa-miR-107	AC016747.3
GOLT1B	hsa-miR-107	CTD-2196E14.9
GOLT1B	hsa-miR-107	DLX6-AS1
GALNT7	hsa-miR-107	AC016747.3
GALNT7	hsa-miR-107	CTD-2196E14.9
GALNT7	hsa-miR-107	DLX6-AS1
ATF3	hsa-miR-107	AC016747.3
ATF3	hsa-miR-107	CTD-2196E14.9
ATF3	hsa-miR-107	DLX6-AS1
BCAT2	hsa-miR-107	AC016747.3
BCAT2	hsa-miR-107	CTD-2196E14.9
BCAT2	hsa-miR-107	DLX6-AS1
GIT2	hsa-miR-107	AC016747.3
GIT2	hsa-miR-107	CTD-2196E14.9
GIT2	hsa-miR-107	DLX6-AS1
DDHD2	hsa-miR-107	AC016747.3
DDHD2	hsa-miR-107	CTD-2196E14.9
DDHD2	hsa-miR-107	DLX6-AS1
CISD1	hsa-miR-107	AC016747.3
CISD1	hsa-miR-107	CTD-2196E14.9
CISD1	hsa-miR-107	DLX6-AS1
CSNK2A2	hsa-miR-107	AC016747.3
CSNK2A2	hsa-miR-107	CTD-2196E14.9
CSNK2A2	hsa-miR-107	DLX6-AS1
BCL2L13	hsa-miR-107	AC016747.3
BCL2L13	hsa-miR-107	CTD-2196E14.9
BCL2L13	hsa-miR-107	DLX6-AS1
AQP11	hsa-miR-107	AC016747.3
AQP11	hsa-miR-107	CTD-2196E14.9
AQP11	hsa-miR-107	DLX6-AS1
CREB5	hsa-miR-107	AC016747.3
CREB5	hsa-miR-107	CTD-2196E14.9
CREB5	hsa-miR-107	DLX6-AS1
ARL6IP6	hsa-miR-107	AC016747.3
ARL6IP6	hsa-miR-107	CTD-2196E14.9
ARL6IP6	hsa-miR-107	DLX6-AS1
HELZ	hsa-miR-107	AC016747.3
HELZ	hsa-miR-107	CTD-2196E14.9
HELZ	hsa-miR-107	DLX6-AS1
GMFB	hsa-miR-107	AC016747.3
GMFB	hsa-miR-107	CTD-2196E14.9
GMFB	hsa-miR-107	DLX6-AS1
GPCPD1	hsa-miR-107	AC016747.3
GPCPD1	hsa-miR-107	CTD-2196E14.9
GPCPD1	hsa-miR-107	DLX6-AS1
CREBL2	hsa-miR-107	AC016747.3
CREBL2	hsa-miR-107	CTD-2196E14.9
CREBL2	hsa-miR-107	DLX6-AS1
CREG1	hsa-miR-107	AC016747.3
CREG1	hsa-miR-107	CTD-2196E14.9
CREG1	hsa-miR-107	DLX6-AS1
ARL8B	hsa-miR-107	AC016747.3
ARL8B	hsa-miR-107	CTD-2196E14.9
ARL8B	hsa-miR-107	DLX6-AS1
CPEB3	hsa-miR-107	AC016747.3
CPEB3	hsa-miR-107	CTD-2196E14.9
CPEB3	hsa-miR-107	DLX6-AS1
G3BP2	hsa-miR-107	AC016747.3
G3BP2	hsa-miR-107	CTD-2196E14.9
G3BP2	hsa-miR-107	DLX6-AS1
GPHN	hsa-miR-107	AC016747.3
GPHN	hsa-miR-107	CTD-2196E14.9
GPHN	hsa-miR-107	DLX6-AS1
HTATIP2	hsa-miR-10a-5p	CTB-89H12.4
DCTN4	hsa-miR-10a-5p	CTB-89H12.4
CTSF	hsa-miR-10a-5p	CTB-89H12.4
C3orf58	hsa-miR-10a-5p	CTB-89H12.4
IFFO2	hsa-miR-10a-5p	CTB-89H12.4
BAZ1B	hsa-miR-10a-5p	CTB-89H12.4
CCNE1	hsa-miR-10a-5p	CTB-89H12.4
ERG	hsa-miR-10a-5p	CTB-89H12.4
ITCH	hsa-miR-10a-5p	CTB-89H12.4
GPR63	hsa-miR-10a-5p	CTB-89H12.4
KBTBD6	hsa-miR-10a-5p	CTB-89H12.4
ATG16L2	hsa-miR-10a-5p	CTB-89H12.4
ATP5F1	hsa-miR-10a-5p	CTB-89H12.4
IGDCC4	hsa-miR-10a-5p	CTB-89H12.4
GOLGA3	hsa-miR-10a-5p	CTB-89H12.4
CEP350	hsa-miR-10a-5p	CTB-89H12.4
GATAD2A	hsa-miR-10a-5p	CTB-89H12.4
CD55	hsa-miR-10a-5p	CTB-89H12.4
CREB3L2	hsa-miR-10a-5p	CTB-89H12.4
COPZ1	hsa-miR-10a-5p	CTB-89H12.4
CBX5	hsa-miR-10a-5p	CTB-89H12.4
IFIT2	hsa-miR-10a-5p	CTB-89H12.4
ALPL	hsa-miR-10a-5p	CTB-89H12.4
FIZ1	hsa-miR-10a-5p	CTB-89H12.4
CCDC28A	hsa-miR-10a-5p	CTB-89H12.4
ABCD3	hsa-miR-10a-5p	CTB-89H12.4
HOXA3	hsa-miR-10a-5p	CTB-89H12.4
GNG12	hsa-miR-10a-5p	CTB-89H12.4
GALNT1	hsa-miR-10a-5p	CTB-89H12.4
INSIG2	hsa-miR-10a-5p	CTB-89H12.4
E2F7	hsa-miR-10a-5p	CTB-89H12.4
CRK	hsa-miR-10a-5p	CTB-89H12.4
CLCF1	hsa-miR-10a-5p	CTB-89H12.4
AKAP11	hsa-miR-10a-5p	CTB-89H12.4
ACAD11	hsa-miR-10a-5p	CTB-89H12.4
FAM111B	hsa-miR-10a-5p	CTB-89H12.4
AGL	hsa-miR-10a-5p	CTB-89H12.4
FUBP3	hsa-miR-10a-5p	CTB-89H12.4
ERBB2IP	hsa-miR-10a-5p	CTB-89H12.4
KCNA6	hsa-miR-10a-5p	CTB-89H12.4
CCDC127	hsa-miR-10a-5p	CTB-89H12.4
ELF4	hsa-miR-10a-5p	CTB-89H12.4
HDHD2	hsa-miR-10a-5p	CTB-89H12.4
HECTD2	hsa-miR-10a-5p	CTB-89H12.4
ABCC4	hsa-miR-1297	CWC15
ACVR2B	hsa-miR-1297	CWC15
ADCY3	hsa-miR-1297	CWC15
ADH5	hsa-miR-1297	CWC15
ADIPOR1	hsa-miR-1297	CWC15
ADM	hsa-miR-1297	CWC15
AFTPH	hsa-miR-1297	CWC15
AGPS	hsa-miR-1297	CWC15
ALPK1	hsa-miR-1297	CWC15
AMOT	hsa-miR-1297	CWC15
AP1S3	hsa-miR-1297	CWC15
ARHGAP29	hsa-miR-1297	CWC15
ARHGEF12	hsa-miR-1297	CWC15
ARID1B	hsa-miR-1297	CWC15
ARID3A	hsa-miR-1297	CWC15
ASCC3	hsa-miR-1297	CWC15
ATG16L1	hsa-miR-1297	CWC15
ATG3	hsa-miR-1297	CWC15
ATP2A2	hsa-miR-1297	CWC15
ATRN	hsa-miR-1297	CWC15
AXIN1	hsa-miR-1297	CWC15
B4GALT4	hsa-miR-1297	CWC15
BAZ2B	hsa-miR-1297	CWC15
BCAT1	hsa-miR-1297	CWC15
BCL6	hsa-miR-1297	CWC15
BRWD1	hsa-miR-1297	CWC15
C6orf120	hsa-miR-1297	CWC15
C7orf43	hsa-miR-1297	CWC15
CAP1	hsa-miR-1297	CWC15
CAPZA2	hsa-miR-1297	CWC15
CARM1	hsa-miR-1297	CWC15
CBFB	hsa-miR-1297	CWC15
CCDC28A	hsa-miR-1297	CWC15
CCNJL	hsa-miR-1297	CWC15
CDK13	hsa-miR-1297	CWC15
CDK2AP1	hsa-miR-1297	CWC15
CDK5R1	hsa-miR-1297	CWC15
CDKN1C	hsa-miR-1297	CWC15
CELSR2	hsa-miR-1297	CWC15
CHFR	hsa-miR-1297	CWC15
CHIC1	hsa-miR-1297	CWC15
CHSY3	hsa-miR-1297	CWC15
CHTF8	hsa-miR-1297	CWC15
CLASP2	hsa-miR-1297	CWC15
CLINT1	hsa-miR-1297	CWC15
CNP	hsa-miR-1297	CWC15
CNTNAP3	hsa-miR-1297	CWC15
CNTNAP3B	hsa-miR-1297	CWC15
COL4A2	hsa-miR-1297	CWC15
COMMD3	hsa-miR-1297	CWC15
COPS7B	hsa-miR-1297	CWC15
COX7A2L	hsa-miR-1297	CWC15
CPD	hsa-miR-1297	CWC15
CPE	hsa-miR-1297	CWC15
CPEB2	hsa-miR-1297	CWC15
CREBBP	hsa-miR-1297	CWC15
CWC15	hsa-miR-1297	CWC15
CYB5A	hsa-miR-1297	CWC15
CYB5D2	hsa-miR-1297	CWC15
DARS2	hsa-miR-1297	CWC15
DBR1	hsa-miR-1297	CWC15
DCAF7	hsa-miR-1297	CWC15
DCLK1	hsa-miR-1297	CWC15
DCTN4	hsa-miR-1297	CWC15
DDX19B	hsa-miR-1297	CWC15
DDX52	hsa-miR-1297	CWC15
DENND1B	hsa-miR-1297	CWC15
DEPDC1	hsa-miR-1297	CWC15
DFFB	hsa-miR-1297	CWC15
DHX15	hsa-miR-1297	CWC15
DNAH14	hsa-miR-1297	CWC15
DNAJA2	hsa-miR-1297	CWC15
DNAJB4	hsa-miR-1297	CWC15
DYNLL2	hsa-miR-1297	CWC15
EBAG9	hsa-miR-1297	CWC15
ECHDC1	hsa-miR-1297	CWC15
EDEM3	hsa-miR-1297	CWC15
EHF	hsa-miR-1297	CWC15
EID2	hsa-miR-1297	CWC15
EIF4A1	hsa-miR-1297	CWC15
EIF4G1	hsa-miR-1297	CWC15
EIF5	hsa-miR-1297	CWC15
ELOVL5	hsa-miR-1297	CWC15
ENOSF1	hsa-miR-1297	CWC15
ENPP4	hsa-miR-1297	CWC15
EPHA5	hsa-miR-1297	CWC15
EPM2AIP1	hsa-miR-1297	CWC15
ETF1	hsa-miR-1297	CWC15
EXD2	hsa-miR-1297	CWC15
EXOG	hsa-miR-1297	CWC15
F2RL1	hsa-miR-1297	CWC15
FAM120A	hsa-miR-1297	CWC15
FAM134A	hsa-miR-1297	CWC15
FAM214B	hsa-miR-1297	CWC15
FAM53C	hsa-miR-1297	CWC15
FANCF	hsa-miR-1297	CWC15
FBXL19	hsa-miR-1297	CWC15
FLVCR1	hsa-miR-1297	CWC15
FPGT	hsa-miR-1297	CWC15
G2E3	hsa-miR-1297	CWC15
GGA2	hsa-miR-1297	CWC15
GGA3	hsa-miR-1297	CWC15
GGCT	hsa-miR-1297	CWC15
GPSM2	hsa-miR-1297	CWC15
GREB1	hsa-miR-1297	CWC15
GRSF1	hsa-miR-1297	CWC15
GSK3B	hsa-miR-1297	CWC15
HCG11	hsa-miR-1297	CWC15
HIAT1	hsa-miR-1297	CWC15
HIPK1	hsa-miR-1297	CWC15
HIPK2	hsa-miR-1297	CWC15
HNRNPA2B1	hsa-miR-1297	CWC15
HNRNPUL1	hsa-miR-1297	CWC15
HPS4	hsa-miR-1297	CWC15
IAH1	hsa-miR-1297	CWC15
IARS	hsa-miR-1297	CWC15
IDE	hsa-miR-1297	CWC15
IFRD1	hsa-miR-1297	CWC15
IK	hsa-miR-1297	CWC15
IMPA1	hsa-miR-1297	CWC15
ITGB8	hsa-miR-1297	CWC15
JAK2	hsa-miR-1297	CWC15
JUN	hsa-miR-1297	CWC15
KALRN	hsa-miR-1297	CWC15
KBTBD8	hsa-miR-1297	CWC15
KCNJ2	hsa-miR-1297	CWC15
AUH	hsa-miR-130b-3p	CTB-92J24.2
AUH	hsa-miR-130b-3p	AC084219.4
AUH	hsa-miR-130b-3p	CTD-3092A11.2
CHERP	hsa-miR-130b-3p	CTB-92J24.2
CHERP	hsa-miR-130b-3p	AC084219.4
CHERP	hsa-miR-130b-3p	CTD-3092A11.2
AHDC1	hsa-miR-130b-3p	CTB-92J24.2
AHDC1	hsa-miR-130b-3p	AC084219.4
AHDC1	hsa-miR-130b-3p	CTD-3092A11.2
CLEC4D	hsa-miR-130b-3p	CTB-92J24.2
CLEC4D	hsa-miR-130b-3p	AC084219.4
CLEC4D	hsa-miR-130b-3p	CTD-3092A11.2
DEK	hsa-miR-130b-3p	CTB-92J24.2
DEK	hsa-miR-130b-3p	AC084219.4
DEK	hsa-miR-130b-3p	CTD-3092A11.2
DEPDC1	hsa-miR-130b-3p	CTB-92J24.2
DEPDC1	hsa-miR-130b-3p	AC084219.4
DEPDC1	hsa-miR-130b-3p	CTD-3092A11.2
CEP350	hsa-miR-130b-3p	CTB-92J24.2
CEP350	hsa-miR-130b-3p	AC084219.4
CEP350	hsa-miR-130b-3p	CTD-3092A11.2
HEG1	hsa-miR-130b-3p	CTB-92J24.2
HEG1	hsa-miR-130b-3p	AC084219.4
HEG1	hsa-miR-130b-3p	CTD-3092A11.2
DERA	hsa-miR-130b-3p	CTB-92J24.2
DERA	hsa-miR-130b-3p	AC084219.4
DERA	hsa-miR-130b-3p	CTD-3092A11.2
FBXO34	hsa-miR-130b-3p	CTB-92J24.2
FBXO34	hsa-miR-130b-3p	AC084219.4
FBXO34	hsa-miR-130b-3p	CTD-3092A11.2
CHUK	hsa-miR-130b-3p	CTB-92J24.2
CHUK	hsa-miR-130b-3p	AC084219.4
CHUK	hsa-miR-130b-3p	CTD-3092A11.2
HES1	hsa-miR-130b-3p	CTB-92J24.2
HES1	hsa-miR-130b-3p	AC084219.4
HES1	hsa-miR-130b-3p	CTD-3092A11.2
AHRR	hsa-miR-130b-3p	CTB-92J24.2
AHRR	hsa-miR-130b-3p	AC084219.4
AHRR	hsa-miR-130b-3p	CTD-3092A11.2
CHD9	hsa-miR-130b-3p	CTB-92J24.2
CHD9	hsa-miR-130b-3p	AC084219.4
CHD9	hsa-miR-130b-3p	CTD-3092A11.2
DIP2C	hsa-miR-130b-3p	CTB-92J24.2
DIP2C	hsa-miR-130b-3p	AC084219.4
DIP2C	hsa-miR-130b-3p	CTD-3092A11.2
FBXW7	hsa-miR-130b-3p	CTB-92J24.2
FBXW7	hsa-miR-130b-3p	AC084219.4
FBXW7	hsa-miR-130b-3p	CTD-3092A11.2
CECR2	hsa-miR-130b-3p	CTB-92J24.2
CECR2	hsa-miR-130b-3p	AC084219.4
CECR2	hsa-miR-130b-3p	CTD-3092A11.2
CHMP4B	hsa-miR-130b-3p	CTB-92J24.2
CHMP4B	hsa-miR-130b-3p	AC084219.4
CHMP4B	hsa-miR-130b-3p	CTD-3092A11.2
CHAC2	hsa-miR-130b-3p	CTB-92J24.2
CHAC2	hsa-miR-130b-3p	AC084219.4
CHAC2	hsa-miR-130b-3p	CTD-3092A11.2
HABP4	hsa-miR-130b-3p	CTB-92J24.2
HABP4	hsa-miR-130b-3p	AC084219.4
HABP4	hsa-miR-130b-3p	CTD-3092A11.2
HBS1L	hsa-miR-130b-3p	CTB-92J24.2
HBS1L	hsa-miR-130b-3p	AC084219.4
HBS1L	hsa-miR-130b-3p	CTD-3092A11.2
CLASP1	hsa-miR-130b-3p	CTB-92J24.2
CLASP1	hsa-miR-130b-3p	AC084219.4
CLASP1	hsa-miR-130b-3p	CTD-3092A11.2
DEDD2	hsa-miR-130b-3p	CTB-92J24.2
DEDD2	hsa-miR-130b-3p	AC084219.4
DEDD2	hsa-miR-130b-3p	CTD-3092A11.2
GPT2	hsa-miR-130b-3p	CTB-92J24.2
GPT2	hsa-miR-130b-3p	AC084219.4
GPT2	hsa-miR-130b-3p	CTD-3092A11.2
AGTPBP1	hsa-miR-130b-3p	CTB-92J24.2
AGTPBP1	hsa-miR-130b-3p	AC084219.4
AGTPBP1	hsa-miR-130b-3p	CTD-3092A11.2
HIF1A	hsa-miR-130b-3p	CTB-92J24.2
HIF1A	hsa-miR-130b-3p	AC084219.4
HIF1A	hsa-miR-130b-3p	CTD-3092A11.2
CAST	hsa-miR-130b-3p	CTB-92J24.2
CAST	hsa-miR-130b-3p	AC084219.4
CAST	hsa-miR-130b-3p	CTD-3092A11.2
GRB10	hsa-miR-130b-3p	CTB-92J24.2
GRB10	hsa-miR-130b-3p	AC084219.4
GRB10	hsa-miR-130b-3p	CTD-3092A11.2
FAM98A	hsa-miR-130b-3p	CTB-92J24.2
FAM98A	hsa-miR-130b-3p	AC084219.4
FAM98A	hsa-miR-130b-3p	CTD-3092A11.2
FANCA	hsa-miR-130b-3p	CTB-92J24.2
FANCA	hsa-miR-130b-3p	AC084219.4
FANCA	hsa-miR-130b-3p	CTD-3092A11.2
CDKN2B	hsa-miR-130b-3p	CTB-92J24.2
CDKN2B	hsa-miR-130b-3p	AC084219.4
CDKN2B	hsa-miR-130b-3p	CTD-3092A11.2
CDK12	hsa-miR-130b-3p	CTB-92J24.2
CDK12	hsa-miR-130b-3p	AC084219.4
CDK12	hsa-miR-130b-3p	CTD-3092A11.2
COG3	hsa-miR-130b-3p	CTB-92J24.2
COG3	hsa-miR-130b-3p	AC084219.4
COG3	hsa-miR-130b-3p	CTD-3092A11.2
ARMC10	hsa-miR-130b-3p	CTB-92J24.2
ARMC10	hsa-miR-130b-3p	AC084219.4
ARMC10	hsa-miR-130b-3p	CTD-3092A11.2
ATG16L1	hsa-miR-130b-3p	CTB-92J24.2
ATG16L1	hsa-miR-130b-3p	AC084219.4
ATG16L1	hsa-miR-130b-3p	CTD-3092A11.2
DYNC1LI2	hsa-miR-130b-3p	CTB-92J24.2
DYNC1LI2	hsa-miR-130b-3p	AC084219.4
DYNC1LI2	hsa-miR-130b-3p	CTD-3092A11.2
ATG2B	hsa-miR-130b-3p	CTB-92J24.2
ATG2B	hsa-miR-130b-3p	AC084219.4
ATG2B	hsa-miR-130b-3p	CTD-3092A11.2
COL8A1	hsa-miR-130b-3p	CTB-92J24.2
COL8A1	hsa-miR-130b-3p	AC084219.4
COL8A1	hsa-miR-130b-3p	CTD-3092A11.2
CASP9	hsa-miR-130b-3p	CTB-92J24.2
CASP9	hsa-miR-130b-3p	AC084219.4
CASP9	hsa-miR-130b-3p	CTD-3092A11.2
ATP13A3	hsa-miR-130b-3p	CTB-92J24.2
ATP13A3	hsa-miR-130b-3p	AC084219.4
ATP13A3	hsa-miR-130b-3p	CTD-3092A11.2
AZIN1	hsa-miR-130b-3p	CTB-92J24.2
AZIN1	hsa-miR-130b-3p	AC084219.4
AZIN1	hsa-miR-130b-3p	CTD-3092A11.2
GRK5	hsa-miR-130b-3p	CTB-92J24.2
GRK5	hsa-miR-130b-3p	AC084219.4
GRK5	hsa-miR-130b-3p	CTD-3092A11.2
FAM135A	hsa-miR-130b-3p	CTB-92J24.2
FAM135A	hsa-miR-130b-3p	AC084219.4
FAM135A	hsa-miR-130b-3p	CTD-3092A11.2
CLN6	hsa-miR-130b-3p	CTB-92J24.2
CLN6	hsa-miR-130b-3p	AC084219.4
CLN6	hsa-miR-130b-3p	CTD-3092A11.2
CLOCK	hsa-miR-130b-3p	CTB-92J24.2
CLOCK	hsa-miR-130b-3p	AC084219.4
CLOCK	hsa-miR-130b-3p	CTD-3092A11.2
CDCA4	hsa-miR-130b-3p	CTB-92J24.2
CDCA4	hsa-miR-130b-3p	AC084219.4
CDCA4	hsa-miR-130b-3p	CTD-3092A11.2
FN3KRP	hsa-miR-130b-3p	CTB-92J24.2
FN3KRP	hsa-miR-130b-3p	AC084219.4
FN3KRP	hsa-miR-130b-3p	CTD-3092A11.2
ATG14	hsa-miR-130b-3p	CTB-92J24.2
ATG14	hsa-miR-130b-3p	AC084219.4
ATG14	hsa-miR-130b-3p	CTD-3092A11.2
COL4A2	hsa-miR-130b-3p	CTB-92J24.2
COL4A2	hsa-miR-130b-3p	AC084219.4
COL4A2	hsa-miR-130b-3p	CTD-3092A11.2
GPBP1	hsa-miR-130b-3p	CTB-92J24.2
GPBP1	hsa-miR-130b-3p	AC084219.4
GPBP1	hsa-miR-130b-3p	CTD-3092A11.2
AGPAT3	hsa-miR-130b-3p	CTB-92J24.2
AGPAT3	hsa-miR-130b-3p	AC084219.4
AGPAT3	hsa-miR-130b-3p	CTD-3092A11.2
DYNLL2	hsa-miR-130b-3p	CTB-92J24.2
DYNLL2	hsa-miR-130b-3p	AC084219.4
DYNLL2	hsa-miR-130b-3p	CTD-3092A11.2
CASP2	hsa-miR-130b-3p	CTB-92J24.2
CASP2	hsa-miR-130b-3p	AC084219.4
CASP2	hsa-miR-130b-3p	CTD-3092A11.2
KBTBD6	hsa-miR-130b-3p	CTB-92J24.2
KBTBD6	hsa-miR-130b-3p	AC084219.4
KBTBD6	hsa-miR-130b-3p	CTD-3092A11.2
BBS4	hsa-miR-130b-3p	CTB-92J24.2
BBS4	hsa-miR-130b-3p	AC084219.4
BBS4	hsa-miR-130b-3p	CTD-3092A11.2
GSPT1	hsa-miR-130b-3p	CTB-92J24.2
GSPT1	hsa-miR-130b-3p	AC084219.4
GSPT1	hsa-miR-130b-3p	CTD-3092A11.2
BLZF1	hsa-miR-130b-3p	CTB-92J24.2
BLZF1	hsa-miR-130b-3p	AC084219.4
BLZF1	hsa-miR-130b-3p	CTD-3092A11.2
FECH	hsa-miR-130b-3p	CTB-92J24.2
FECH	hsa-miR-130b-3p	AC084219.4
FECH	hsa-miR-130b-3p	CTD-3092A11.2
FGFR3	hsa-miR-130b-3p	CTB-92J24.2
FGFR3	hsa-miR-130b-3p	AC084219.4
FGFR3	hsa-miR-130b-3p	CTD-3092A11.2
CDC73	hsa-miR-130b-3p	CTB-92J24.2
CDC73	hsa-miR-130b-3p	AC084219.4
CDC73	hsa-miR-130b-3p	CTD-3092A11.2
COL4A1	hsa-miR-130b-3p	CTB-92J24.2
COL4A1	hsa-miR-130b-3p	AC084219.4
COL4A1	hsa-miR-130b-3p	CTD-3092A11.2
DPYSL2	hsa-miR-130b-3p	CTB-92J24.2
DPYSL2	hsa-miR-130b-3p	AC084219.4
DPYSL2	hsa-miR-130b-3p	CTD-3092A11.2
FNBP1L	hsa-miR-130b-3p	CTB-92J24.2
FNBP1L	hsa-miR-130b-3p	AC084219.4
FNBP1L	hsa-miR-130b-3p	CTD-3092A11.2
BTRC	hsa-miR-130b-3p	CTB-92J24.2
BTRC	hsa-miR-130b-3p	AC084219.4
BTRC	hsa-miR-130b-3p	CTD-3092A11.2
CASP7	hsa-miR-130b-3p	CTB-92J24.2
CASP7	hsa-miR-130b-3p	AC084219.4
CASP7	hsa-miR-130b-3p	CTD-3092A11.2
FNDC3A	hsa-miR-130b-3p	CTB-92J24.2
FNDC3A	hsa-miR-130b-3p	AC084219.4
FNDC3A	hsa-miR-130b-3p	CTD-3092A11.2
EIF3I	hsa-miR-130b-3p	CTB-92J24.2
EIF3I	hsa-miR-130b-3p	AC084219.4
EIF3I	hsa-miR-130b-3p	CTD-3092A11.2
CCDC137	hsa-miR-130b-3p	CTB-92J24.2
CCDC137	hsa-miR-130b-3p	AC084219.4
CCDC137	hsa-miR-130b-3p	CTD-3092A11.2
HSDL1	hsa-miR-130b-3p	CTB-92J24.2
HSDL1	hsa-miR-130b-3p	AC084219.4
HSDL1	hsa-miR-130b-3p	CTD-3092A11.2
BECN1	hsa-miR-130b-3p	CTB-92J24.2
BECN1	hsa-miR-130b-3p	AC084219.4
BECN1	hsa-miR-130b-3p	CTD-3092A11.2
FAM114A1	hsa-miR-130b-3p	CTB-92J24.2
FAM114A1	hsa-miR-130b-3p	AC084219.4
FAM114A1	hsa-miR-130b-3p	CTD-3092A11.2
CDADC1	hsa-miR-130b-3p	CTB-92J24.2
CDADC1	hsa-miR-130b-3p	AC084219.4
CDADC1	hsa-miR-130b-3p	CTD-3092A11.2
BRD1	hsa-miR-130b-3p	CTB-92J24.2
BRD1	hsa-miR-130b-3p	AC084219.4
BRD1	hsa-miR-130b-3p	CTD-3092A11.2
BTBD10	hsa-miR-130b-3p	CTB-92J24.2
BTBD10	hsa-miR-130b-3p	AC084219.4
BTBD10	hsa-miR-130b-3p	CTD-3092A11.2
BTF3L4	hsa-miR-130b-3p	CTB-92J24.2
BTF3L4	hsa-miR-130b-3p	AC084219.4
BTF3L4	hsa-miR-130b-3p	CTD-3092A11.2
DOCK10	hsa-miR-130b-3p	CTB-92J24.2
DOCK10	hsa-miR-130b-3p	AC084219.4
DOCK10	hsa-miR-130b-3p	CTD-3092A11.2
DDX6	hsa-miR-130b-3p	CTB-92J24.2
DDX6	hsa-miR-130b-3p	AC084219.4
DDX6	hsa-miR-130b-3p	CTD-3092A11.2
C11orf57	hsa-miR-130b-3p	CTB-92J24.2
C11orf57	hsa-miR-130b-3p	AC084219.4
C11orf57	hsa-miR-130b-3p	CTD-3092A11.2
AGFG1	hsa-miR-130b-3p	CTB-92J24.2
AGFG1	hsa-miR-130b-3p	AC084219.4
AGFG1	hsa-miR-130b-3p	CTD-3092A11.2
KATNAL1	hsa-miR-130b-3p	CTB-92J24.2
KATNAL1	hsa-miR-130b-3p	AC084219.4
KATNAL1	hsa-miR-130b-3p	CTD-3092A11.2
HOOK3	hsa-miR-130b-3p	CTB-92J24.2
HOOK3	hsa-miR-130b-3p	AC084219.4
HOOK3	hsa-miR-130b-3p	CTD-3092A11.2
CCDC15	hsa-miR-130b-3p	CTB-92J24.2
CCDC15	hsa-miR-130b-3p	AC084219.4
CCDC15	hsa-miR-130b-3p	CTD-3092A11.2
CCDC6	hsa-miR-130b-3p	CTB-92J24.2
CCDC6	hsa-miR-130b-3p	AC084219.4
CCDC6	hsa-miR-130b-3p	CTD-3092A11.2
GTF2B	hsa-miR-130b-3p	CTB-92J24.2
GTF2B	hsa-miR-130b-3p	AC084219.4
GTF2B	hsa-miR-130b-3p	CTD-3092A11.2
FBN1	hsa-miR-130b-3p	CTB-92J24.2
FBN1	hsa-miR-130b-3p	AC084219.4
FBN1	hsa-miR-130b-3p	CTD-3092A11.2
H19	hsa-miR-130b-3p	CTB-92J24.2
H19	hsa-miR-130b-3p	AC084219.4
H19	hsa-miR-130b-3p	CTD-3092A11.2
H2AFZ	hsa-miR-130b-3p	CTB-92J24.2
H2AFZ	hsa-miR-130b-3p	AC084219.4
H2AFZ	hsa-miR-130b-3p	CTD-3092A11.2
ARL4A	hsa-miR-130b-3p	CTB-92J24.2
ARL4A	hsa-miR-130b-3p	AC084219.4
ARL4A	hsa-miR-130b-3p	CTD-3092A11.2
DNM2	hsa-miR-130b-3p	CTB-92J24.2
DNM2	hsa-miR-130b-3p	AC084219.4
DNM2	hsa-miR-130b-3p	CTD-3092A11.2
ARHGAP11B	hsa-miR-130b-3p	CTB-92J24.2
ARHGAP11B	hsa-miR-130b-3p	AC084219.4
ARHGAP11B	hsa-miR-130b-3p	CTD-3092A11.2
ADAM19	hsa-miR-130b-3p	CTB-92J24.2
ADAM19	hsa-miR-130b-3p	AC084219.4
ADAM19	hsa-miR-130b-3p	CTD-3092A11.2
ICAM1	hsa-miR-130b-3p	CTB-92J24.2
ICAM1	hsa-miR-130b-3p	AC084219.4
ICAM1	hsa-miR-130b-3p	CTD-3092A11.2
C1orf112	hsa-miR-130b-3p	CTB-92J24.2
C1orf112	hsa-miR-130b-3p	AC084219.4
C1orf112	hsa-miR-130b-3p	CTD-3092A11.2
ADAM12	hsa-miR-130b-3p	CTB-92J24.2
ADAM12	hsa-miR-130b-3p	AC084219.4
ADAM12	hsa-miR-130b-3p	CTD-3092A11.2
HS3ST5	hsa-miR-130b-3p	CTB-92J24.2
HS3ST5	hsa-miR-130b-3p	AC084219.4
HS3ST5	hsa-miR-130b-3p	CTD-3092A11.2
ENPP5	hsa-miR-130b-3p	CTB-92J24.2
ENPP5	hsa-miR-130b-3p	AC084219.4
ENPP5	hsa-miR-130b-3p	CTD-3092A11.2
FAM104A	hsa-miR-130b-3p	CTB-92J24.2
FAM104A	hsa-miR-130b-3p	AC084219.4
FAM104A	hsa-miR-130b-3p	CTD-3092A11.2
CD2AP	hsa-miR-130b-3p	CTB-92J24.2
CD2AP	hsa-miR-130b-3p	AC084219.4
CD2AP	hsa-miR-130b-3p	CTD-3092A11.2
HSPA4L	hsa-miR-130b-3p	CTB-92J24.2
HSPA4L	hsa-miR-130b-3p	AC084219.4
HSPA4L	hsa-miR-130b-3p	CTD-3092A11.2
GUCY1A3	hsa-miR-130b-3p	CTB-92J24.2
GUCY1A3	hsa-miR-130b-3p	AC084219.4
GUCY1A3	hsa-miR-130b-3p	CTD-3092A11.2
DNAL1	hsa-miR-130b-3p	CTB-92J24.2
DNAL1	hsa-miR-130b-3p	AC084219.4
DNAL1	hsa-miR-130b-3p	CTD-3092A11.2
DAD1	hsa-miR-130b-3p	CTB-92J24.2
DAD1	hsa-miR-130b-3p	AC084219.4
DAD1	hsa-miR-130b-3p	CTD-3092A11.2
CA13	hsa-miR-130b-3p	CTB-92J24.2
CA13	hsa-miR-130b-3p	AC084219.4
CA13	hsa-miR-130b-3p	CTD-3092A11.2
HYAL1	hsa-miR-130b-3p	CTB-92J24.2
HYAL1	hsa-miR-130b-3p	AC084219.4
HYAL1	hsa-miR-130b-3p	CTD-3092A11.2
ADIPOR2	hsa-miR-130b-3p	CTB-92J24.2
ADIPOR2	hsa-miR-130b-3p	AC084219.4
ADIPOR2	hsa-miR-130b-3p	CTD-3092A11.2
CASC4	hsa-miR-130b-3p	CTB-92J24.2
CASC4	hsa-miR-130b-3p	AC084219.4
CASC4	hsa-miR-130b-3p	CTD-3092A11.2
IER5	hsa-miR-130b-3p	CTB-92J24.2
IER5	hsa-miR-130b-3p	AC084219.4
IER5	hsa-miR-130b-3p	CTD-3092A11.2
ATP5B	hsa-miR-130b-3p	CTB-92J24.2
ATP5B	hsa-miR-130b-3p	AC084219.4
ATP5B	hsa-miR-130b-3p	CTD-3092A11.2
AKAP7	hsa-miR-130b-3p	CTB-92J24.2
AKAP7	hsa-miR-130b-3p	AC084219.4
AKAP7	hsa-miR-130b-3p	CTD-3092A11.2
AKAP9	hsa-miR-130b-3p	CTB-92J24.2
AKAP9	hsa-miR-130b-3p	AC084219.4
AKAP9	hsa-miR-130b-3p	CTD-3092A11.2
CCDC9	hsa-miR-130b-3p	CTB-92J24.2
CCDC9	hsa-miR-130b-3p	AC084219.4
CCDC9	hsa-miR-130b-3p	CTD-3092A11.2
CCT6A	hsa-miR-130b-3p	CTB-92J24.2
CCT6A	hsa-miR-130b-3p	AC084219.4
CCT6A	hsa-miR-130b-3p	CTD-3092A11.2
AP3D1	hsa-miR-130b-3p	CTB-92J24.2
AP3D1	hsa-miR-130b-3p	AC084219.4
AP3D1	hsa-miR-130b-3p	CTD-3092A11.2
DCBLD2	hsa-miR-130b-3p	CTB-92J24.2
DCBLD2	hsa-miR-130b-3p	AC084219.4
DCBLD2	hsa-miR-130b-3p	CTD-3092A11.2
CSK	hsa-miR-130b-3p	CTB-92J24.2
CSK	hsa-miR-130b-3p	AC084219.4
CSK	hsa-miR-130b-3p	CTD-3092A11.2
CXorf38	hsa-miR-130b-3p	CTB-92J24.2
CXorf38	hsa-miR-130b-3p	AC084219.4
CXorf38	hsa-miR-130b-3p	CTD-3092A11.2
GPATCH2	hsa-miR-130b-3p	CTB-92J24.2
GPATCH2	hsa-miR-130b-3p	AC084219.4
GPATCH2	hsa-miR-130b-3p	CTD-3092A11.2
DDX3X	hsa-miR-130b-3p	CTB-92J24.2
DDX3X	hsa-miR-130b-3p	AC084219.4
DDX3X	hsa-miR-130b-3p	CTD-3092A11.2
CAPRIN1	hsa-miR-130b-3p	CTB-92J24.2
CAPRIN1	hsa-miR-130b-3p	AC084219.4
CAPRIN1	hsa-miR-130b-3p	CTD-3092A11.2
GDI2	hsa-miR-130b-3p	CTB-92J24.2
GDI2	hsa-miR-130b-3p	AC084219.4
GDI2	hsa-miR-130b-3p	CTD-3092A11.2
ITSN2	hsa-miR-130b-3p	CTB-92J24.2
ITSN2	hsa-miR-130b-3p	AC084219.4
ITSN2	hsa-miR-130b-3p	CTD-3092A11.2
ATXN1	hsa-miR-130b-3p	CTB-92J24.2
ATXN1	hsa-miR-130b-3p	AC084219.4
ATXN1	hsa-miR-130b-3p	CTD-3092A11.2
ELF1	hsa-miR-130b-3p	CTB-92J24.2
ELF1	hsa-miR-130b-3p	AC084219.4
ELF1	hsa-miR-130b-3p	CTD-3092A11.2
ERBB2IP	hsa-miR-130b-3p	CTB-92J24.2
ERBB2IP	hsa-miR-130b-3p	AC084219.4
ERBB2IP	hsa-miR-130b-3p	CTD-3092A11.2
AKIRIN2	hsa-miR-130b-3p	CTB-92J24.2
AKIRIN2	hsa-miR-130b-3p	AC084219.4
AKIRIN2	hsa-miR-130b-3p	CTD-3092A11.2
CPSF6	hsa-miR-130b-3p	CTB-92J24.2
CPSF6	hsa-miR-130b-3p	AC084219.4
CPSF6	hsa-miR-130b-3p	CTD-3092A11.2
DNAJB12	hsa-miR-130b-3p	CTB-92J24.2
DNAJB12	hsa-miR-130b-3p	AC084219.4
DNAJB12	hsa-miR-130b-3p	CTD-3092A11.2
C4orf3	hsa-miR-130b-3p	CTB-92J24.2
C4orf3	hsa-miR-130b-3p	AC084219.4
C4orf3	hsa-miR-130b-3p	CTD-3092A11.2
C5orf15	hsa-miR-130b-3p	CTB-92J24.2
C5orf15	hsa-miR-130b-3p	AC084219.4
C5orf15	hsa-miR-130b-3p	CTD-3092A11.2
IPO5	hsa-miR-130b-3p	CTB-92J24.2
IPO5	hsa-miR-130b-3p	AC084219.4
IPO5	hsa-miR-130b-3p	CTD-3092A11.2
DCDC2	hsa-miR-130b-3p	CTB-92J24.2
DCDC2	hsa-miR-130b-3p	AC084219.4
DCDC2	hsa-miR-130b-3p	CTD-3092A11.2
GNPTAB	hsa-miR-130b-3p	CTB-92J24.2
GNPTAB	hsa-miR-130b-3p	AC084219.4
GNPTAB	hsa-miR-130b-3p	CTD-3092A11.2
GCH1	hsa-miR-130b-3p	CTB-92J24.2
GCH1	hsa-miR-130b-3p	AC084219.4
GCH1	hsa-miR-130b-3p	CTD-3092A11.2
ITPKB	hsa-miR-130b-3p	CTB-92J24.2
ITPKB	hsa-miR-130b-3p	AC084219.4
ITPKB	hsa-miR-130b-3p	CTD-3092A11.2
IL17RD	hsa-miR-130b-3p	CTB-92J24.2
IL17RD	hsa-miR-130b-3p	AC084219.4
IL17RD	hsa-miR-130b-3p	CTD-3092A11.2
EIF4E3	hsa-miR-130b-3p	CTB-92J24.2
EIF4E3	hsa-miR-130b-3p	AC084219.4
EIF4E3	hsa-miR-130b-3p	CTD-3092A11.2
C2orf15	hsa-miR-130b-3p	CTB-92J24.2
C2orf15	hsa-miR-130b-3p	AC084219.4
C2orf15	hsa-miR-130b-3p	CTD-3092A11.2
CRLS1	hsa-miR-130b-3p	CTB-92J24.2
CRLS1	hsa-miR-130b-3p	AC084219.4
CRLS1	hsa-miR-130b-3p	CTD-3092A11.2
FOSL1	hsa-miR-130b-3p	CTB-92J24.2
FOSL1	hsa-miR-130b-3p	AC084219.4
FOSL1	hsa-miR-130b-3p	CTD-3092A11.2
DCAF7	hsa-miR-130b-3p	CTB-92J24.2
DCAF7	hsa-miR-130b-3p	AC084219.4
DCAF7	hsa-miR-130b-3p	CTD-3092A11.2
IL6ST	hsa-miR-130b-3p	CTB-92J24.2
IL6ST	hsa-miR-130b-3p	AC084219.4
IL6ST	hsa-miR-130b-3p	CTD-3092A11.2
GLIPR2	hsa-miR-130b-3p	CTB-92J24.2
GLIPR2	hsa-miR-130b-3p	AC084219.4
GLIPR2	hsa-miR-130b-3p	CTD-3092A11.2
C5orf24	hsa-miR-130b-3p	CTB-92J24.2
C5orf24	hsa-miR-130b-3p	AC084219.4
C5orf24	hsa-miR-130b-3p	CTD-3092A11.2
INSIG1	hsa-miR-130b-3p	CTB-92J24.2
INSIG1	hsa-miR-130b-3p	AC084219.4
INSIG1	hsa-miR-130b-3p	CTD-3092A11.2
DDX46	hsa-miR-130b-3p	CTB-92J24.2
DDX46	hsa-miR-130b-3p	AC084219.4
DDX46	hsa-miR-130b-3p	CTD-3092A11.2
ITGB8	hsa-miR-130b-3p	CTB-92J24.2
ITGB8	hsa-miR-130b-3p	AC084219.4
ITGB8	hsa-miR-130b-3p	CTD-3092A11.2
CAPN7	hsa-miR-130b-3p	CTB-92J24.2
CAPN7	hsa-miR-130b-3p	AC084219.4
CAPN7	hsa-miR-130b-3p	CTD-3092A11.2
ADAM11	hsa-miR-130b-3p	CTB-92J24.2
ADAM11	hsa-miR-130b-3p	AC084219.4
ADAM11	hsa-miR-130b-3p	CTD-3092A11.2
FNDC4	hsa-miR-130b-3p	CTB-92J24.2
FNDC4	hsa-miR-130b-3p	AC084219.4
FNDC4	hsa-miR-130b-3p	CTD-3092A11.2
ABCB7	hsa-miR-130b-3p	CTB-92J24.2
ABCB7	hsa-miR-130b-3p	AC084219.4
ABCB7	hsa-miR-130b-3p	CTD-3092A11.2
CORO1C	hsa-miR-130b-3p	CTB-92J24.2
CORO1C	hsa-miR-130b-3p	AC084219.4
CORO1C	hsa-miR-130b-3p	CTD-3092A11.2
C4orf32	hsa-miR-130b-3p	CTB-92J24.2
C4orf32	hsa-miR-130b-3p	AC084219.4
C4orf32	hsa-miR-130b-3p	CTD-3092A11.2
FSTL5	hsa-miR-130b-3p	CTB-92J24.2
FSTL5	hsa-miR-130b-3p	AC084219.4
FSTL5	hsa-miR-130b-3p	CTD-3092A11.2
ITPA	hsa-miR-130b-3p	CTB-92J24.2
ITPA	hsa-miR-130b-3p	AC084219.4
ITPA	hsa-miR-130b-3p	CTD-3092A11.2
GLTSCR1	hsa-miR-130b-3p	CTB-92J24.2
GLTSCR1	hsa-miR-130b-3p	AC084219.4
GLTSCR1	hsa-miR-130b-3p	CTD-3092A11.2
IQGAP2	hsa-miR-130b-3p	CTB-92J24.2
IQGAP2	hsa-miR-130b-3p	AC084219.4
IQGAP2	hsa-miR-130b-3p	CTD-3092A11.2
IP6K1	hsa-miR-130b-3p	CTB-92J24.2
IP6K1	hsa-miR-130b-3p	AC084219.4
IP6K1	hsa-miR-130b-3p	CTD-3092A11.2
INO80	hsa-miR-130b-3p	CTB-92J24.2
INO80	hsa-miR-130b-3p	AC084219.4
INO80	hsa-miR-130b-3p	CTD-3092A11.2
CAMTA1	hsa-miR-130b-3p	CTB-92J24.2
CAMTA1	hsa-miR-130b-3p	AC084219.4
CAMTA1	hsa-miR-130b-3p	CTD-3092A11.2
ITGAE	hsa-miR-130b-3p	CTB-92J24.2
ITGAE	hsa-miR-130b-3p	AC084219.4
ITGAE	hsa-miR-130b-3p	CTD-3092A11.2
ABHD10	hsa-miR-130b-3p	CTB-92J24.2
ABHD10	hsa-miR-130b-3p	AC084219.4
ABHD10	hsa-miR-130b-3p	CTD-3092A11.2
GADD45A	hsa-miR-130b-3p	CTB-92J24.2
GADD45A	hsa-miR-130b-3p	AC084219.4
GADD45A	hsa-miR-130b-3p	CTD-3092A11.2
INPP4A	hsa-miR-130b-3p	CTB-92J24.2
INPP4A	hsa-miR-130b-3p	AC084219.4
INPP4A	hsa-miR-130b-3p	CTD-3092A11.2
ABCC5	hsa-miR-130b-3p	CTB-92J24.2
ABCC5	hsa-miR-130b-3p	AC084219.4
ABCC5	hsa-miR-130b-3p	CTD-3092A11.2
CANX	hsa-miR-130b-3p	CTB-92J24.2
CANX	hsa-miR-130b-3p	AC084219.4
CANX	hsa-miR-130b-3p	CTD-3092A11.2
CCNG1	hsa-miR-132-3p	COX10-AS1
C7orf60	hsa-miR-132-3p	COX10-AS1
C20orf24	hsa-miR-132-3p	COX10-AS1
BTG2	hsa-miR-132-3p	COX10-AS1
C5orf28	hsa-miR-132-3p	COX10-AS1
C10orf12	hsa-miR-132-3p	COX10-AS1
GTF2F2	hsa-miR-132-3p	COX10-AS1
GPD2	hsa-miR-132-3p	COX10-AS1
C1QL1	hsa-miR-132-3p	COX10-AS1
CDC123	hsa-miR-132-3p	COX10-AS1
ELK3	hsa-miR-132-3p	COX10-AS1
E2F5	hsa-miR-132-3p	COX10-AS1
ELMOD2	hsa-miR-132-3p	COX10-AS1
CD55	hsa-miR-132-3p	COX10-AS1
BZW1	hsa-miR-132-3p	COX10-AS1
FAM161A	hsa-miR-132-3p	COX10-AS1
BTBD1	hsa-miR-132-3p	COX10-AS1
CAND1	hsa-miR-132-3p	COX10-AS1
BRI3	hsa-miR-132-3p	COX10-AS1
CRK	hsa-miR-132-3p	COX10-AS1
CREB5	hsa-miR-132-3p	COX10-AS1
AMPD3	hsa-miR-132-3p	COX10-AS1
KANK1	hsa-miR-132-3p	COX10-AS1
CCND1	hsa-miR-132-3p	COX10-AS1
ANLN	hsa-miR-132-3p	COX10-AS1
EIF2S1	hsa-miR-132-3p	COX10-AS1
EPS8	hsa-miR-132-3p	COX10-AS1
ERLIN1	hsa-miR-132-3p	COX10-AS1
BID	hsa-miR-132-3p	COX10-AS1
BTAF1	hsa-miR-132-3p	COX10-AS1
IQGAP1	hsa-miR-132-3p	COX10-AS1
DNAJC25-GNG10	hsa-miR-132-3p	COX10-AS1
CASD1	hsa-miR-132-3p	COX10-AS1
CEP135	hsa-miR-132-3p	COX10-AS1
ADCY3	hsa-miR-132-3p	COX10-AS1
ANKRD27	hsa-miR-132-3p	COX10-AS1
CTNNB1	hsa-miR-132-3p	COX10-AS1
DOCK8	hsa-miR-132-3p	COX10-AS1
ARHGEF10	hsa-miR-132-3p	COX10-AS1
ELF2	hsa-miR-132-3p	COX10-AS1
ELOVL2	hsa-miR-132-3p	COX10-AS1
ASXL1	hsa-miR-132-3p	COX10-AS1
BEND7	hsa-miR-132-3p	COX10-AS1
IPO8	hsa-miR-132-3p	COX10-AS1
CEP120	hsa-miR-132-3p	COX10-AS1
DDIT4	hsa-miR-132-3p	COX10-AS1
CNOT7	hsa-miR-132-3p	COX10-AS1
GMNN	hsa-miR-132-3p	COX10-AS1
GATA2	hsa-miR-132-3p	COX10-AS1
CCDC43	hsa-miR-132-3p	COX10-AS1
CETN3	hsa-miR-132-3p	COX10-AS1
DOLPP1	hsa-miR-132-3p	COX10-AS1
EDN1	hsa-miR-132-3p	COX10-AS1
BCL10	hsa-miR-132-3p	COX10-AS1
HIVEP1	hsa-miR-132-3p	COX10-AS1
BCL7B	hsa-miR-132-3p	COX10-AS1
CENPO	hsa-miR-132-3p	COX10-AS1
DERL1	hsa-miR-132-3p	COX10-AS1
DDHD2	hsa-miR-132-3p	COX10-AS1
CKAP2	hsa-miR-132-3p	COX10-AS1
FBXW4	hsa-miR-132-3p	COX10-AS1
ACP2	hsa-miR-132-3p	COX10-AS1
GCOM1	hsa-miR-132-3p	COX10-AS1
G3BP2	hsa-miR-132-3p	COX10-AS1
GTF2H2	hsa-miR-132-3p	COX10-AS1
HHEX	hsa-miR-132-3p	COX10-AS1
EFCAB7	hsa-miR-132-3p	COX10-AS1
CHRAC1	hsa-miR-132-3p	COX10-AS1
HS2ST1	hsa-miR-132-3p	COX10-AS1
BRD3	hsa-miR-132-3p	COX10-AS1
IKBKAP	hsa-miR-132-3p	COX10-AS1
CLCC1	hsa-miR-132-3p	COX10-AS1
COMMD8	hsa-miR-132-3p	COX10-AS1
CIR1	hsa-miR-132-3p	COX10-AS1
FBXL20	hsa-miR-132-3p	COX10-AS1
ARNT	hsa-miR-132-3p	COX10-AS1
CFL2	hsa-miR-132-3p	COX10-AS1
GBP1	hsa-miR-132-3p	COX10-AS1
FRK	hsa-miR-132-3p	COX10-AS1
DCUN1D3	hsa-miR-132-3p	COX10-AS1
CLIC4	hsa-miR-132-3p	COX10-AS1
CHMP1B	hsa-miR-132-3p	COX10-AS1
IER3IP1	hsa-miR-132-3p	COX10-AS1
FAM84B	hsa-miR-132-3p	COX10-AS1
DCAF13	hsa-miR-132-3p	COX10-AS1
FOXN3	hsa-miR-132-3p	COX10-AS1
FAM60A	hsa-miR-132-3p	COX10-AS1
BAZ2B	hsa-miR-132-3p	COX10-AS1
CMTM3	hsa-miR-132-3p	COX10-AS1
GMNN	hsa-miR-135a-5p	APCDD1L-AS1
GRPEL2	hsa-miR-135a-5p	APCDD1L-AS1
ANKRD42	hsa-miR-135a-5p	APCDD1L-AS1
HBP1	hsa-miR-135a-5p	APCDD1L-AS1
FRK	hsa-miR-135a-5p	APCDD1L-AS1
C1orf198	hsa-miR-135a-5p	APCDD1L-AS1
HERC5	hsa-miR-135a-5p	APCDD1L-AS1
CADM4	hsa-miR-135a-5p	APCDD1L-AS1
CCNY	hsa-miR-135a-5p	APCDD1L-AS1
HIAT1	hsa-miR-135a-5p	APCDD1L-AS1
BCL11B	hsa-miR-135a-5p	APCDD1L-AS1
AFAP1L1	hsa-miR-135a-5p	APCDD1L-AS1
GGA3	hsa-miR-135a-5p	APCDD1L-AS1
G3BP1	hsa-miR-135a-5p	APCDD1L-AS1
CHURC1	hsa-miR-135a-5p	APCDD1L-AS1
DMRTA2	hsa-miR-135a-5p	APCDD1L-AS1
DIAPH3	hsa-miR-135a-5p	APCDD1L-AS1
DIDO1	hsa-miR-135a-5p	APCDD1L-AS1
DSCR3	hsa-miR-135a-5p	APCDD1L-AS1
CDC40	hsa-miR-135a-5p	APCDD1L-AS1
DPH1	hsa-miR-135a-5p	APCDD1L-AS1
CARD16	hsa-miR-135a-5p	APCDD1L-AS1
CEP170	hsa-miR-135a-5p	APCDD1L-AS1
FOXN3	hsa-miR-135a-5p	APCDD1L-AS1
BDP1	hsa-miR-135a-5p	APCDD1L-AS1
HIF1AN	hsa-miR-135a-5p	APCDD1L-AS1
BOC	hsa-miR-135a-5p	APCDD1L-AS1
DAAM1	hsa-miR-135a-5p	APCDD1L-AS1
BRWD1	hsa-miR-135a-5p	APCDD1L-AS1
ABCE1	hsa-miR-135a-5p	APCDD1L-AS1
BZW1	hsa-miR-135a-5p	APCDD1L-AS1
FOXK1	hsa-miR-135a-5p	APCDD1L-AS1
EDIL3	hsa-miR-135a-5p	APCDD1L-AS1
C1QBP	hsa-miR-135a-5p	APCDD1L-AS1
FAM111A	hsa-miR-135a-5p	APCDD1L-AS1
DARS	hsa-miR-135a-5p	APCDD1L-AS1
HMGB2	hsa-miR-135a-5p	APCDD1L-AS1
HNRNPH3	hsa-miR-135a-5p	APCDD1L-AS1
CHCHD1	hsa-miR-135a-5p	APCDD1L-AS1
ANP32E	hsa-miR-135a-5p	APCDD1L-AS1
CYBRD1	hsa-miR-135a-5p	APCDD1L-AS1
HOMER1	hsa-miR-135a-5p	APCDD1L-AS1
CISH	hsa-miR-135a-5p	APCDD1L-AS1
ENTPD4	hsa-miR-135a-5p	APCDD1L-AS1
EXOC5	hsa-miR-135a-5p	APCDD1L-AS1
ANXA7	hsa-miR-135a-5p	APCDD1L-AS1
HIBADH	hsa-miR-135a-5p	APCDD1L-AS1
ATF3	hsa-miR-135a-5p	APCDD1L-AS1
DCUN1D4	hsa-miR-135a-5p	APCDD1L-AS1
FOXN2	hsa-miR-135a-5p	APCDD1L-AS1
BCL11A	hsa-miR-135a-5p	APCDD1L-AS1
CYB5A	hsa-miR-135a-5p	APCDD1L-AS1
BTAF1	hsa-miR-135a-5p	APCDD1L-AS1
CXCL12	hsa-miR-135a-5p	APCDD1L-AS1
CMTM3	hsa-miR-135a-5p	APCDD1L-AS1
ARHGAP19	hsa-miR-135a-5p	APCDD1L-AS1
EIF1	hsa-miR-135a-5p	APCDD1L-AS1
ENSA	hsa-miR-135a-5p	APCDD1L-AS1
FCF1	hsa-miR-135a-5p	APCDD1L-AS1
CERCAM	hsa-miR-135a-5p	APCDD1L-AS1
CSPP1	hsa-miR-135a-5p	APCDD1L-AS1
KANK1	hsa-miR-135a-5p	APCDD1L-AS1
IREB2	hsa-miR-135a-5p	APCDD1L-AS1
ASXL1	hsa-miR-135a-5p	APCDD1L-AS1
BAZ2B	hsa-miR-135a-5p	APCDD1L-AS1
HS6ST1	hsa-miR-135a-5p	APCDD1L-AS1
CPA4	hsa-miR-135a-5p	APCDD1L-AS1
ARL6IP6	hsa-miR-135a-5p	APCDD1L-AS1
ASPG	hsa-miR-135a-5p	APCDD1L-AS1
INO80C	hsa-miR-135a-5p	APCDD1L-AS1
INTS3	hsa-miR-135a-5p	APCDD1L-AS1
HSPA13	hsa-miR-135a-5p	APCDD1L-AS1
FAM105A	hsa-miR-135a-5p	APCDD1L-AS1
INTS6	hsa-miR-135a-5p	APCDD1L-AS1
CTTNBP2NL	hsa-miR-135b-5p	CTC-444N24.8
CTTNBP2NL	hsa-miR-135b-5p	DCP1A
GLE1	hsa-miR-135b-5p	CTC-444N24.8
GLE1	hsa-miR-135b-5p	DCP1A
AEBP2	hsa-miR-135b-5p	CTC-444N24.8
AEBP2	hsa-miR-135b-5p	DCP1A
COL4A2	hsa-miR-135b-5p	CTC-444N24.8
COL4A2	hsa-miR-135b-5p	DCP1A
ATP11C	hsa-miR-135b-5p	CTC-444N24.8
ATP11C	hsa-miR-135b-5p	DCP1A
COL5A1	hsa-miR-135b-5p	CTC-444N24.8
COL5A1	hsa-miR-135b-5p	DCP1A
GRPEL1	hsa-miR-135b-5p	CTC-444N24.8
GRPEL1	hsa-miR-135b-5p	DCP1A
CAMTA1	hsa-miR-135b-5p	CTC-444N24.8
CAMTA1	hsa-miR-135b-5p	DCP1A
C7orf60	hsa-miR-135b-5p	CTC-444N24.8
C7orf60	hsa-miR-135b-5p	DCP1A
INPP4A	hsa-miR-135b-5p	CTC-444N24.8
INPP4A	hsa-miR-135b-5p	DCP1A
DCBLD2	hsa-miR-135b-5p	CTC-444N24.8
DCBLD2	hsa-miR-135b-5p	DCP1A
CNTNAP1	hsa-miR-135b-5p	CTC-444N24.8
CNTNAP1	hsa-miR-135b-5p	DCP1A
DOLPP1	hsa-miR-135b-5p	CTC-444N24.8
DOLPP1	hsa-miR-135b-5p	DCP1A
ATP6V1F	hsa-miR-135b-5p	CTC-444N24.8
ATP6V1F	hsa-miR-135b-5p	DCP1A
ARHGEF2	hsa-miR-135b-5p	CTC-444N24.8
ARHGEF2	hsa-miR-135b-5p	DCP1A
IRS2	hsa-miR-135b-5p	CTC-444N24.8
IRS2	hsa-miR-135b-5p	DCP1A
DCP1A	hsa-miR-135b-5p	CTC-444N24.8
DCP1A	hsa-miR-135b-5p	DCP1A
IL7R	hsa-miR-135b-5p	CTC-444N24.8
IL7R	hsa-miR-135b-5p	DCP1A
CHM	hsa-miR-135b-5p	CTC-444N24.8
CHM	hsa-miR-135b-5p	DCP1A
CASZ1	hsa-miR-135b-5p	CTC-444N24.8
CASZ1	hsa-miR-135b-5p	DCP1A
C15orf57	hsa-miR-135b-5p	CTC-444N24.8
C15orf57	hsa-miR-135b-5p	DCP1A
FGD4	hsa-miR-135b-5p	CTC-444N24.8
FGD4	hsa-miR-135b-5p	DCP1A
ARID5B	hsa-miR-135b-5p	CTC-444N24.8
ARID5B	hsa-miR-135b-5p	DCP1A
ARFGEF1	hsa-miR-135b-5p	CTC-444N24.8
ARFGEF1	hsa-miR-135b-5p	DCP1A
FBN2	hsa-miR-135b-5p	CTC-444N24.8
FBN2	hsa-miR-135b-5p	DCP1A
CTR9	hsa-miR-135b-5p	CTC-444N24.8
CTR9	hsa-miR-135b-5p	DCP1A
IWS1	hsa-miR-135b-5p	CTC-444N24.8
IWS1	hsa-miR-135b-5p	DCP1A
C19orf12	hsa-miR-135b-5p	CTC-444N24.8
C19orf12	hsa-miR-135b-5p	DCP1A
DYRK1B	hsa-miR-135b-5p	CTC-444N24.8
DYRK1B	hsa-miR-135b-5p	DCP1A
IKBKAP	hsa-miR-135b-5p	CTC-444N24.8
IKBKAP	hsa-miR-135b-5p	DCP1A
DNMBP	hsa-miR-135b-5p	CTC-444N24.8
DNMBP	hsa-miR-135b-5p	DCP1A
BRD3	hsa-miR-135b-5p	CTC-444N24.8
BRD3	hsa-miR-135b-5p	DCP1A
ANLN	hsa-miR-135b-5p	CTC-444N24.8
ANLN	hsa-miR-135b-5p	DCP1A
GIGYF2	hsa-miR-135b-5p	CTC-444N24.8
GIGYF2	hsa-miR-135b-5p	DCP1A
GEN1	hsa-miR-135b-5p	CTC-444N24.8
GEN1	hsa-miR-135b-5p	DCP1A
DYRK1A	hsa-miR-135b-5p	CTC-444N24.8
DYRK1A	hsa-miR-135b-5p	DCP1A
C16orf72	hsa-miR-135b-5p	CTC-444N24.8
C16orf72	hsa-miR-135b-5p	DCP1A
BZW2	hsa-miR-135b-5p	CTC-444N24.8
BZW2	hsa-miR-135b-5p	DCP1A
CAPRIN2	hsa-miR-135b-5p	CTC-444N24.8
CAPRIN2	hsa-miR-135b-5p	DCP1A
HBEGF	hsa-miR-135b-5p	CTC-444N24.8
HBEGF	hsa-miR-135b-5p	DCP1A
DNAJC5B	hsa-miR-135b-5p	CTC-444N24.8
DNAJC5B	hsa-miR-135b-5p	DCP1A
FASTKD5	hsa-miR-135b-5p	CTC-444N24.8
FASTKD5	hsa-miR-135b-5p	DCP1A
BSDC1	hsa-miR-135b-5p	CTC-444N24.8
BSDC1	hsa-miR-135b-5p	DCP1A
IDH1	hsa-miR-135b-5p	CTC-444N24.8
IDH1	hsa-miR-135b-5p	DCP1A
FAM45B	hsa-miR-135b-5p	CTC-444N24.8
FAM45B	hsa-miR-135b-5p	DCP1A
HMOX1	hsa-miR-135b-5p	CTC-444N24.8
HMOX1	hsa-miR-135b-5p	DCP1A
ACOX1	hsa-miR-135b-5p	CTC-444N24.8
ACOX1	hsa-miR-135b-5p	DCP1A
FAM73B	hsa-miR-135b-5p	CTC-444N24.8
FAM73B	hsa-miR-135b-5p	DCP1A
FBLN1	hsa-miR-135b-5p	CTC-444N24.8
FBLN1	hsa-miR-135b-5p	DCP1A
FAM45A	hsa-miR-135b-5p	CTC-444N24.8
FAM45A	hsa-miR-135b-5p	DCP1A
BAHCC1	hsa-miR-135b-5p	CTC-444N24.8
BAHCC1	hsa-miR-135b-5p	DCP1A
ATP9A	hsa-miR-135b-5p	CTC-444N24.8
ATP9A	hsa-miR-135b-5p	DCP1A
BECN1	hsa-miR-135b-5p	CTC-444N24.8
BECN1	hsa-miR-135b-5p	DCP1A
FLVCR1	hsa-miR-135b-5p	CTC-444N24.8
FLVCR1	hsa-miR-135b-5p	DCP1A
FAM84B	hsa-miR-135b-5p	CTC-444N24.8
FAM84B	hsa-miR-135b-5p	DCP1A
HSPD1	hsa-miR-135b-5p	CTC-444N24.8
HSPD1	hsa-miR-135b-5p	DCP1A
ABCB7	hsa-miR-135b-5p	CTC-444N24.8
ABCB7	hsa-miR-135b-5p	DCP1A
HNRNPK	hsa-miR-135b-5p	CTC-444N24.8
HNRNPK	hsa-miR-135b-5p	DCP1A
ERP29	hsa-miR-135b-5p	CTC-444N24.8
ERP29	hsa-miR-135b-5p	DCP1A
GADD45A	hsa-miR-135b-5p	CTC-444N24.8
GADD45A	hsa-miR-135b-5p	DCP1A
HNRNPD	hsa-miR-135b-5p	CTC-444N24.8
HNRNPD	hsa-miR-135b-5p	DCP1A
HN1L	hsa-miR-135b-5p	CTC-444N24.8
HN1L	hsa-miR-135b-5p	DCP1A
BAG4	hsa-miR-135b-5p	CTC-444N24.8
BAG4	hsa-miR-135b-5p	DCP1A
AATF	hsa-miR-135b-5p	CTC-444N24.8
AATF	hsa-miR-135b-5p	DCP1A
CYBRD1	hsa-miR-136-5p	CTD-2116N17.1
CYBRD1	hsa-miR-136-5p	CTC-444N24.11
CYBRD1	hsa-miR-136-5p	DCP1A
ACER2	hsa-miR-136-5p	CTD-2116N17.1
ACER2	hsa-miR-136-5p	CTC-444N24.11
ACER2	hsa-miR-136-5p	DCP1A
ERLIN1	hsa-miR-136-5p	CTD-2116N17.1
ERLIN1	hsa-miR-136-5p	CTC-444N24.11
ERLIN1	hsa-miR-136-5p	DCP1A
ABI2	hsa-miR-136-5p	CTD-2116N17.1
ABI2	hsa-miR-136-5p	CTC-444N24.11
ABI2	hsa-miR-136-5p	DCP1A
FMR1	hsa-miR-136-5p	CTD-2116N17.1
FMR1	hsa-miR-136-5p	CTC-444N24.11
FMR1	hsa-miR-136-5p	DCP1A
FGD4	hsa-miR-136-5p	CTD-2116N17.1
FGD4	hsa-miR-136-5p	CTC-444N24.11
FGD4	hsa-miR-136-5p	DCP1A
FBXL20	hsa-miR-136-5p	CTD-2116N17.1
FBXL20	hsa-miR-136-5p	CTC-444N24.11
FBXL20	hsa-miR-136-5p	DCP1A
GINS1	hsa-miR-136-5p	CTD-2116N17.1
GINS1	hsa-miR-136-5p	CTC-444N24.11
GINS1	hsa-miR-136-5p	DCP1A
GNPNAT1	hsa-miR-136-5p	CTD-2116N17.1
GNPNAT1	hsa-miR-136-5p	CTC-444N24.11
GNPNAT1	hsa-miR-136-5p	DCP1A
GOSR1	hsa-miR-136-5p	CTD-2116N17.1
GOSR1	hsa-miR-136-5p	CTC-444N24.11
GOSR1	hsa-miR-136-5p	DCP1A
CLEC2B	hsa-miR-136-5p	CTD-2116N17.1
CLEC2B	hsa-miR-136-5p	CTC-444N24.11
[truncated: 13,173 more rows]
