# Supplementary material for: Comprehensive analysis of the lncRNA-associated ceRNA network identifies neuroinflammation biomarkers for Alzheimer's disease
Source: Royal Society of Chemistry journal article supplement (doi:10.1039/c9mo00129h), 2019-11-22
Supplement: c9mo00129h1.zip [file Table_S2.xls]

## Sheet: Sheet1
Table S2. The top 5% ranked nodes of LncACeNET by degree centrality and betweenness centrality.
name	Class	Degree	BetweennessCentrality	ClosenessCentrality	AverageShortestPathLength
hsa-miR-424-5p	miRNA	228	0.0901128	0.345273	2.89626
hsa-miR-186-5p	miRNA	187	0.044241	0.329987	3.03043
hsa-miR-494-3p	miRNA	185	0.0598037	0.319102	3.1338
hsa-miR-320a	miRNA	184	0.0648151	0.330627	3.02456
hsa-miR-130b-3p	miRNA	168	0.0570816	0.333619	2.99743
hsa-miR-200a-3p	miRNA	150	0.0508016	0.327059	3.05755
hsa-miR-381-3p	miRNA	148	0.0368265	0.334191	2.9923
hsa-miR-195-5p	miRNA	143	0.0255282	0.320752	3.11767
hsa-miR-200b-3p	miRNA	135	0.0443034	0.331511	3.0165
hsa-miR-300	miRNA	134	0.0387527	0.313383	3.19098
hsa-miR-106b-5p	miRNA	133	0.0303505	0.336832	2.96884
hsa-miR-340-5p	miRNA	132	0.0200695	0.310529	3.22031
hsa-miR-16-5p	miRNA	132	0.0158232	0.315704	3.16752
hsa-miR-15a-5p	miRNA	127	0.0250104	0.326902	3.05902
hsa-miR-448	miRNA	126	0.0394915	0.323414	3.09201
hsa-miR-1297	miRNA	126	0.0355673	0.306414	3.26356
hsa-miR-374b-5p	miRNA	123	0.0262579	0.311451	3.21078
hsa-miR-107	miRNA	123	0.0179662	0.310106	3.22471
hsa-miR-144-3p	miRNA	121	0.0379328	0.328714	3.04216
hsa-miR-34c-5p	miRNA	119	0.0305381	0.340022	2.94098
hsa-miR-30e-5p	miRNA	119	0.0139016	0.313744	3.18732
hsa-miR-27a-3p	miRNA	118	0.0237036	0.330146	3.02896
hsa-miR-93-5p	miRNA	117	0.0289343	0.32927	3.03702
hsa-miR-103a-3p	miRNA	114	0.0103315	0.29909	3.34348
hsa-miR-23a-3p	miRNA	112	0.0185609	0.319625	3.12867
hsa-miR-497-5p	miRNA	111	0.00871977	0.299353	3.34054
hsa-miR-30d-5p	miRNA	110	0.00942343	0.301737	3.31415
hsa-miR-374a-5p	miRNA	109	0.0188045	0.311807	3.20711
hsa-miR-543	miRNA	105	0.0154595	0.309894	3.22691
hsa-miR-30b-5p	miRNA	105	0.0102524	0.3106	3.21957
hsa-miR-181c-5p	miRNA	105	0.0169538	0.320602	3.11913
hsa-miR-320c	miRNA	103	0.0302084	0.318134	3.14333
hsa-miR-181a-5p	miRNA	103	0.0157133	0.306138	3.2665
hsa-miR-9-5p	miRNA	102	0.0193302	0.293428	3.40799
hsa-miR-520d-3p	miRNA	101	0.0275323	0.312808	3.19685
hsa-miR-27b-3p	miRNA	100	0.0227758	0.328794	3.04142
hsa-miR-155-5p	miRNA	96	0.0286871	0.322649	3.09934
hsa-miR-185-5p	miRNA	95	0.0242957	0.332156	3.01063
hsa-miR-98-5p	miRNA	94	0.016911	0.317394	3.15066
hsa-miR-491-5p	miRNA	93	0.0303726	0.333211	3.0011
hsa-miR-30c-5p	miRNA	93	0.0218606	0.321888	3.10667
hsa-miR-148a-3p	miRNA	93	0.0226028	0.325965	3.06782
hsa-let-7a-5p	miRNA	93	0.0146321	0.307311	3.25403
hsa-miR-539-5p	miRNA	92	0.0241795	0.321584	3.1096
hsa-miR-485-5p	miRNA	91	0.031359	0.315194	3.17265
hsa-miR-15b-5p	miRNA	91	0.0203546	0.330386	3.02676
hsa-miR-132-3p	miRNA	90	0.0191262	0.315412	3.17045
hsa-let-7g-5p	miRNA	89	0.00889739	0.301337	3.31855
hsa-miR-26b-5p	miRNA	86	0.00978301	0.303482	3.29509
hsa-miR-199a-5p	miRNA	86	0.0209446	0.316804	3.15652
hsa-miR-421	miRNA	85	0.020219	0.325343	3.07368
hsa-miR-34a-5p	miRNA	82	0.0154571	0.323261	3.09348
hsa-miR-31-5p	miRNA	80	0.0193396	0.326902	3.05902
hsa-miR-222-3p	miRNA	78	0.00654522	0.304294	3.28629
hsa-miR-26a-5p	miRNA	76	0.00761224	0.308423	3.2423
hsa-miR-221-3p	miRNA	76	0.00634008	0.304907	3.27969
hsa-miR-146b-5p	miRNA	76	0.0228648	0.289689	3.45198
hsa-miR-135a-5p	miRNA	75	0.0171569	0.304498	3.28409
hsa-miR-218-5p	miRNA	74	0.013224	0.308075	3.24597
hsa-miR-136-5p	miRNA	70	0.016066	0.32113	3.114
hsa-miR-363-3p	miRNA	69	0.0160424	0.329827	3.03189
hsa-miR-362-3p	miRNA	69	0.0155806	0.319401	3.13087
hsa-miR-24-3p	miRNA	69	0.00946954	0.308982	3.23644
hsa-miR-153-3p	miRNA	69	0.015814	0.317468	3.14993
hsa-miR-148b-3p	miRNA	67	0.00721548	0.297459	3.3618
hsa-miR-425-5p	miRNA	66	0.0123764	0.327845	3.05022
hsa-miR-873-5p	miRNA	65	0.0153361	0.317172	3.15286
hsa-miR-433-3p	miRNA	65	0.0080206	0.309472	3.2313
hsa-miR-224-5p	miRNA	65	0.0127217	0.297654	3.3596
hsa-miR-135b-5p	miRNA	65	0.0141007	0.322802	3.09787
hsa-miR-361-5p	miRNA	64	0.00763256	0.30477	3.28116
hsa-miR-143-3p	miRNA	64	0.0107518	0.308632	3.2401
hsa-miR-496	miRNA	63	0.0147258	0.312521	3.19978
hsa-miR-199b-5p	miRNA	63	0.0139676	0.330787	3.02309
hsa-miR-7-5p	miRNA	62	0.0124489	0.316143	3.16312
hsa-miR-376a-3p	miRNA	61	0.00824252	0.31629	3.16166
hsa-miR-142-3p	miRNA	60	0.00932869	0.31769	3.14773
hsa-miR-544a	miRNA	57	0.0117207	0.314322	3.18145
hsa-miR-146a-5p	miRNA	57	0.0152851	0.314757	3.17705
hsa-miR-223-3p	miRNA	56	0.0125983	0.322649	3.09934
hsa-miR-216a-5p	miRNA	54	0.00655279	0.293744	3.40433
hsa-miR-154-5p	miRNA	53	0.00932977	0.301203	3.32001
hsa-miR-140-5p	miRNA	53	0.00593912	0.305111	3.27749
hsa-miR-139-5p	miRNA	52	0.00858088	0.29824	3.35301
hsa-miR-370-3p	miRNA	49	0.0111662	0.32113	3.114
hsa-miR-365a-3p	miRNA	49	0.0124229	0.302674	3.30389
hsa-miR-206	miRNA	48	0.010174	0.321433	3.11107
hsa-miR-193a-3p	miRNA	47	0.00823682	0.284849	3.51063
hsa-miR-329-3p	miRNA	45	0.00842608	0.307034	3.25696
hsa-miR-150-5p	miRNA	45	0.00872921	0.30127	3.31928
hsa-miR-10a-5p	miRNA	45	0.0119193	0.285386	3.50403
hsa-miR-708-5p	miRNA	39	0.00583627	0.308005	3.2467
hsa-miR-138-5p	miRNA	39	0.0117728	0.289382	3.45565
hsa-miR-379-5p	miRNA	33	0.00503396	0.272065	3.67559
CAND1	mRNA	26	0.00660028	0.315595	3.16862
DCUN1D4	mRNA	25	0.00551109	0.301303	3.31891
IQGAP1	mRNA	23	0.0065834	0.318617	3.13856
hsa-miR-504-5p	miRNA	22	0.00292644	0.268478	3.72471
AFF4	mRNA	22	0.00431612	0.308667	3.23974
FOXJ3	mRNA	22	0.00443013	0.295558	3.38343
GOLT1B	mRNA	22	0.00246169	0.297557	3.3607
DPY19L4	mRNA	21	0.00283775	0.29873	3.34751
BTBD3	mRNA	21	0.00474698	0.309297	3.23314
ARL6IP6	mRNA	21	0.00335296	0.29932	3.34091
CHD1	mRNA	20	0.00295617	0.304873	3.28006
BTAF1	mRNA	20	0.00300512	0.298664	3.34824
CPEB3	mRNA	19	0.00343324	0.30197	3.31158
FAM46A	mRNA	19	0.00291202	0.306104	3.26686
DEPDC1B	mRNA	18	0.00279511	0.299583	3.33798
JAZF1	mRNA	18	0.00483458	0.305419	3.27419
EPT1	mRNA	18	0.00504411	0.304396	3.28519
CPEB4	mRNA	18	0.00327233	0.302909	3.30132
CCNG1	mRNA	18	0.00186978	0.28972	3.45161
ATP6V1C1	mRNA	18	0.00306279	0.307138	3.25587
ACVR2A	mRNA	18	0.00178873	0.293839	3.40323
DNMBP	mRNA	17	0.00281764	0.294283	3.39809
EFNA3	mRNA	17	0.00329474	0.304261	3.28666
DDHD2	mRNA	17	0.00404667	0.296135	3.37683
AKAP2	mRNA	17	0.0027729	0.297168	3.3651
KAT2B	mRNA	17	0.001453	0.284819	3.511
HS2ST1	mRNA	17	0.002029	0.293396	3.40836
GPCPD1	mRNA	17	0.00311313	0.304464	3.28446
GINS1	mRNA	16	0.00307444	0.304193	3.28739
HIATL1	mRNA	16	0.0011446	0.285296	3.50513
DRAM1	mRNA	16	0.00122443	0.284879	3.51026
EED	mRNA	15	0.00649112	0.296715	3.37023
GPR37	mRNA	15	0.00278671	0.303516	3.29472
IRF2BP2	mRNA	15	0.00181592	0.296586	3.3717
FLNB	mRNA	15	0.00234426	0.293776	3.40396
DYNLT3	mRNA	15	0.00188844	0.289106	3.45894
CNOT6	mRNA	15	0.00211303	0.286434	3.4912
CDC42SE2	mRNA	15	0.00433799	0.306517	3.26246
ASXL1	mRNA	15	0.00145113	0.284998	3.5088
CUL5	mRNA	15	0.00296474	0.29441	3.39663
CDYL	mRNA	15	0.00182027	0.292641	3.41716
BZW1	mRNA	15	0.00123833	0.285595	3.50147
ANKFY1	mRNA	15	0.00205924	0.288372	3.46774
