# Supplementary material for: Comprehensive analysis of the lncRNA-associated ceRNA network identifies neuroinflammation biomarkers for Alzheimer's disease
Source: Royal Society of Chemistry journal article supplement (doi:10.1039/c9mo00129h), 2019-11-22
Supplement: c9mo00129h1.zip [file Table_S3.xls]

## Sheet: Sheet1
Table S3. The list of known AD related genes from human miRNA-associated disease database: GAD; HMDD; LncRNA disease; miR2Disease.
class	Gene symbol	database
mRNA	A2M	GAD
mRNA	ABCA1	GAD
mRNA	ABCA12	GAD
mRNA	ABCB1	GAD
mRNA	ABCG5	GAD
mRNA	ACE	GAD
mRNA	ACHE	GAD
mRNA	ACTA1	GAD
mRNA	ADRA2A	GAD
mRNA	AGT	GAD
mRNA	AHSG	GAD
mRNA	APBB1	GAD
mRNA	APBB2	GAD
mRNA	APBB3	GAD
mRNA	APOA1	GAD
mRNA	APOA4	GAD
mRNA	APOC1	GAD
mRNA	APOC2	GAD
mRNA	APOC3	GAD
mRNA	APOD	GAD
mRNA	APOE	GAD
mRNA	APOF	GAD
mRNA	APOM	GAD
mRNA	APP	GAD
mRNA	BACE1	GAD
mRNA	BACE2	GAD
mRNA	BCHE	GAD
mRNA	BDNF	GAD
mRNA	BICC1	GAD
mRNA	BLMH	GAD
mRNA	C1R	GAD
mRNA	C1r	GAD
mRNA	CAST	GAD
mRNA	CAT	GAD
mRNA	CBS	GAD
mRNA	CCL2	GAD
mRNA	CCL4	GAD
mRNA	CCR2	GAD
mRNA	CCR5	GAD
mRNA	CD14	GAD
mRNA	CDC2	GAD
mRNA	CETP	GAD
mRNA	CH25H	GAD
mRNA	CHAT	GAD
mRNA	CHRM1	GAD
mRNA	CHRNA3	GAD
mRNA	CHRNA4	GAD
mRNA	CHRNA7	GAD
mRNA	CHRNB2	GAD
mRNA	COMT	GAD
mRNA	CRP	GAD
mRNA	CST3	GAD
mRNA	CTNNA3	GAD
mRNA	CTSD	GAD
mRNA	CTSG	GAD
mRNA	CXCL1	GAD
mRNA	CYP17A1	GAD
mRNA	CYP19A1	GAD
mRNA	CYP1A1	GAD
mRNA	CYP2D6	GAD
mRNA	CYP46	GAD
mRNA	CYP46A1	GAD
mRNA	DLD	GAD
mRNA	DLST	GAD
mRNA	DVL1	GAD
mRNA	ESR1	GAD
mRNA	ESR2	GAD
mRNA	FAS	GAD
mRNA	FASLG	GAD
mRNA	FGF1	GAD
mRNA	FOS	GAD
mRNA	FYN	GAD
mRNA	GAPDH	GAD
mRNA	GAPDHS	GAD
mRNA	GRIN2B	GAD
mRNA	GSK3B	GAD
mRNA	GSTO1	GAD
mRNA	GSTO2	GAD
mRNA	HFE	GAD
mRNA	HHEX	GAD
mRNA	HLA-A	GAD
mRNA	HLA-DRB1	GAD
mRNA	HMOX1	GAD
mRNA	HSD11B1	GAD
mRNA	HSPA1B	GAD
mRNA	HSPA2	GAD
mRNA	HSPG2	GAD
mRNA	HTR2A	GAD
mRNA	HTR2C	GAD
mRNA	HTR6	GAD
mRNA	HTRA1	GAD
mRNA	ICAM1	GAD
mRNA	IDE	GAD
mRNA	IFNG	GAD
mRNA	IGF2	GAD
mRNA	IL10	GAD
mRNA	IL1A	GAD
mRNA	IL1B	GAD
mRNA	IL1R1	GAD
mRNA	IL1R2	GAD
mRNA	IL1RN	GAD
mRNA	IL6	GAD
mRNA	IL8	GAD
mRNA	INS	GAD
mRNA	KCNIP3	GAD
mRNA	KIF11	GAD
mRNA	KNS2	GAD
mRNA	LDLR	GAD
mRNA	LIPA	GAD
mRNA	LPA	GAD
mRNA	LPL	GAD
mRNA	LRP1	GAD
mRNA	LRP8	GAD
mRNA	LRPAP1	GAD
mRNA	LRRK2	GAD
mRNA	LTA	GAD
mRNA	MAOA	GAD
mRNA	MAPK8IP1	GAD
mRNA	MAPT	GAD
mRNA	MIF	GAD
mRNA	MME	GAD
mRNA	MMP3	GAD
mRNA	MMP9	GAD
mRNA	MPO	GAD
mRNA	MS	GAD
mRNA	MT-CO1	GAD
mRNA	MT-ND1	GAD
mRNA	MTHFR	GAD
mRNA	MTR	GAD
mRNA	NAT1	GAD
mRNA	NCSTN	GAD
mRNA	NOS1	GAD
mRNA	NOS3	GAD
mRNA	NOTCH4	GAD
mRNA	NQO1	GAD
mRNA	NTF3	GAD
mRNA	NTRK1	GAD
mRNA	Notch4	GAD
mRNA	OLR1	GAD
mRNA	OPRL1	GAD
mRNA	OPRS1	GAD
mRNA	PAX2	GAD
mRNA	PIK3R1	GAD
mRNA	PIN1	GAD
mRNA	PLAU	GAD
mRNA	PNMT	GAD
mRNA	PON1	GAD
mRNA	PON2	GAD
mRNA	PON3	GAD
mRNA	POU2F1	GAD
mRNA	PPARA	GAD
mRNA	PPP1R3A	GAD
mRNA	PRND	GAD
mRNA	PRNP	GAD
mRNA	PSEN1	GAD
mRNA	PSEN2	GAD
mRNA	PSMB9	GAD
mRNA	PTGS2	GAD
mRNA	PTPRA	GAD
mRNA	PTPRC	GAD
mRNA	REN	GAD
mRNA	RFC3	GAD
mRNA	SASH1	GAD
mRNA	SCARB1	GAD
mRNA	SERPINA3	GAD
mRNA	SLC11A1	GAD
mRNA	SLC11A2	GAD
mRNA	SLC18A3	GAD
mRNA	SLC6A4	GAD
mRNA	SNCA	GAD
mRNA	SOAT1	GAD
mRNA	SREBF1	GAD
mRNA	STH	GAD
mRNA	TCN1	GAD
mRNA	TCN2	GAD
mRNA	TF	GAD
mRNA	TFAM	GAD
mRNA	TFCP2	GAD
mRNA	TIMP1	GAD
mRNA	TNF	GAD
mRNA	TOMM40	GAD
mRNA	TP53	GAD
mRNA	TPH1	GAD
mRNA	TTLL7	GAD
mRNA	UBQLN1	GAD
mRNA	VDR	GAD
mRNA	VLDLR	GAD
mRNA	WT1	GAD
lncRNA	51A	lncRNAdisease
lncRNA	BACE1-AS	lncRNAdisease
lncRNA	BCYRN1	lncRNAdisease
lncRNA	CDKN2B-AS1	lncRNAdisease
lncRNA	GDNFOS	lncRNAdisease
lncRNA	HAR1A	lncRNAdisease
lncRNA	HAR1B	lncRNAdisease
lncRNA	SNHG3	lncRNAdisease
lncRNA	SOX2-OT	lncRNAdisease
miRNA	hsa-miR-101-1	HMDD
miRNA	hsa-miR-103a-1	HMDD
miRNA	hsa-miR-103a-2	HMDD
miRNA	hsa-miR-106b	HMDD
miRNA	hsa-miR-107	HMDD
miRNA	hsa-miR-124-1	HMDD
miRNA	hsa-miR-124-2	HMDD
miRNA	hsa-miR-124-3	HMDD
miRNA	hsa-miR-125b-1	HMDD
miRNA	hsa-miR-125b-2	HMDD
miRNA	hsa-miR-128-1	HMDD
miRNA	hsa-miR-128-2	HMDD
miRNA	hsa-miR-137	HMDD
miRNA	hsa-miR-144	HMDD
miRNA	hsa-miR-146a	HMDD
miRNA	hsa-miR-153-1	HMDD
miRNA	hsa-miR-153-2	HMDD
miRNA	hsa-miR-17	HMDD
miRNA	hsa-miR-181c	HMDD
miRNA	hsa-miR-195	HMDD
miRNA	hsa-miR-20a	HMDD
miRNA	hsa-miR-21	HMDD
miRNA	hsa-miR-29a	HMDD
miRNA	hsa-miR-29b-1	HMDD
miRNA	hsa-miR-29b-2	HMDD
miRNA	hsa-miR-34c	HMDD
miRNA	hsa-miR-590	HMDD
miRNA	hsa-miR-9-1	HMDD
miRNA	hsa-miR-9-2	HMDD
miRNA	hsa-miR-9-3	HMDD
miRNA	hsa-let-7i	mir2disease
miRNA	hsa-miR-101	mir2disease
miRNA	hsa-miR-106b	mir2disease
miRNA	hsa-miR-107	mir2disease
miRNA	hsa-miR-124a	mir2disease
miRNA	hsa-miR-125b	mir2disease
miRNA	hsa-miR-128a	mir2disease
miRNA	hsa-miR-146a	mir2disease
miRNA	hsa-miR-15a	mir2disease
miRNA	hsa-miR-181c	mir2disease
miRNA	hsa-miR-197	mir2disease
miRNA	hsa-miR-210	mir2disease
miRNA	hsa-miR-22	mir2disease
miRNA	hsa-miR-26b	mir2disease
miRNA	hsa-miR-298	mir2disease
miRNA	hsa-miR-29a	mir2disease
miRNA	hsa-miR-29b-1	mir2disease
miRNA	hsa-miR-320	mir2disease
miRNA	hsa-miR-328	mir2disease
miRNA	hsa-miR-34a	mir2disease
miRNA	hsa-miR-363	mir2disease
miRNA	hsa-miR-511	mir2disease
miRNA	hsa-miR-9	mir2disease
miRNA	hsa-miR-93	mir2disease
