# Supplementary material for: Comprehensive analysis of the lncRNA-associated ceRNA network identifies neuroinflammation biomarkers for Alzheimer's disease
Source: Royal Society of Chemistry journal article supplement (doi:10.1039/c9mo00129h), 2019-11-22
Supplement: c9mo00129h1.zip [file Table_S4.xls]

## Sheet: Sheet1
Table S4. The candidate gene list of AD biomarkers derived from Random walk algorithm.
Gene symbol	Random Walk Algorithom Score	Adjusted P value
ENOPH1	0.140151	0
KANK2	0.140092	0
CERS6-AS1	0.14013	0.001
CBX6	0.140132	0.001
CPEB1	0.140213	0.003
FEM1C	0.000330743	0.012
CROT	0.000328131	0.012
ITGB3	0.000219592	0.014
BNIP3L	0.000229034	0.015
ISY1	0.000182473	0.015
CXorf23	0.000277884	0.016
hsa-miR-155-5p	0.0438641	0.018
AXIN2	0.000109796	0.018
C9orf69	4.55e-05	0.018
CASP6	9.28e-06	0.018
CCDC138	4.62e-06	0.018
CTHRC1	0.000192437	0.018
DYRK4	7.85e-05	0.018
AAK1	4.07e-05	0.019
AMOTL1	0.00024721	0.019
APAF1	0.000112336	0.019
CHAF1A	6.82e-05	0.019
GTF2E1	0.000113876	0.019
INSM1	0.00012176	0.019
ARHGAP42	0.000250657	0.02
CCT2	0.000177898	0.02
CLIP3	4.99e-05	0.02
H2AFY2	3.09e-05	0.02
IFT46	8.74e-05	0.02
C14orf1	0.000231321	0.021
CTB-89H12.4	0.000233756	0.022
ERBB3	0.000253345	0.023
DUSP8	0.000209751	0.024
FAM69B	0.000111632	0.024
ATP8B2	0.000173078	0.024
hsa-miR-148b-3p	0.0124972	0.025
FNDC3A	0.000245795	0.025
C5orf46	7.62e-05	0.025
EBF4	9.41e-05	0.025
AMN1	0.000190487	0.026
hsa-miR-9-5p	0.0351663	0.03
CHMP1B	0.000227176	0.03
FAIM	0.000141855	0.03
AC005076.5	4.04e-06	0.03
AC007246.3	0.000112253	0.03
BAK1	1.05e-05	0.03
BRF1	0.00015093	0.03
C16orf45	4.37e-06	0.03
C22orf46	0.000175955	0.03
CC2D1A	0.000142468	0.03
CYTH4	8.4e-05	0.03
DYNC1LI1	0.000108553	0.03
HIST1H4A	2.9e-05	0.03
HIST1H4H	0.000184149	0.03
HM13	0.000177401	0.03
HOXB13	7.65e-05	0.03
IST1	6.81e-05	0.03
HSD17B12	0.000205749	0.032
FOXRED2	0.000152468	0.032
CYP51A1	0.000251454	0.033
CNOT4	0.000326903	0.034
GALNT2	0.000202843	0.034
EFEMP1	0.000199905	0.035
DNAJB1	0.000199451	0.035
ACTR10	0.000189498	0.035
COPS3	3.16e-05	0.036
DDB1	0.000129002	0.036
hsa-miR-15b-5p	0.0204867	0.037
GOLGA3	0.000266795	0.037
FANCI	0.000113469	0.037
AC005537.2	2.26e-05	0.037
ACSL1	0.00014048	0.037
ATP7A	2.29e-05	0.037
CDC42EP2	0.000126964	0.037
CTD-2574D22.4	3.35e-05	0.037
DACH1	8.95e-05	0.037
HAUS3	8.99e-05	0.037
CD274	0.000107728	0.038
C15orf39	0.000118441	0.038
AKTIP	0.000182748	0.039
CALU	0.00020496	0.04
ARL1	0.000204068	0.041
CSDE1	0.000226125	0.041
CAPN7	0.000122565	0.042
B3GNT9	0.000171642	0.042
BCAP29	0.000282176	0.044
CLK3	0.000124951	0.044
GJC1	0.000147976	0.045
FAM69A	0.00021003	0.045
DYNC2H1	7.98e-05	0.045
FAM26E	0.000139072	0.045
AMFR	0.000159532	0.045
GLA	0.000152758	0.047
CENPO	9.5e-05	0.047
ADAM17	5.64e-05	0.047
IL7	0.000248356	0.048
IPO4	0.000159883	0.048
ALAD	0.000157649	0.049
ETS1	0.000229241	0.049
ESPN	2.51e-05	0.049
EOMES	0.000240794	0.05
