# Supplementary material for: Comprehensive analysis of the lncRNA-associated ceRNA network identifies neuroinflammation biomarkers for Alzheimer's disease
Source: Royal Society of Chemistry journal article supplement (doi:10.1039/c9mo00129h), 2019-11-22
Supplement: c9mo00129h1.zip [file Table_S5.xls]

## Sheet: Sheet1
Table S4. Enriched GO terms for biological process based on the first neighbour of hsa-miR-155-5p.
Category	Term	Count	%	PValue	Genes	List Total	Pop Hits	Pop Total	Fold Enrichment	Benjamini	FDR(%)
GOTERM_BP_FAT	GO:0008219~cell death	11	11.828	0.00188972	ATXN1, CASP6, AKTIP, ERBB3, BNIP3L, BCAP29, APAF1, AXIN2, ITSN1, BIRC3, AHR	65	719	13528	3.18408	0.750518	2.82981
GOTERM_BP_FAT	GO:0016265~death	11	11.828	0.00198894	ATXN1, CASP6, AKTIP, ERBB3, BNIP3L, BCAP29, APAF1, AXIN2, ITSN1, BIRC3, AHR	65	724	13528	3.16209	0.518413	2.9763
GOTERM_BP_FAT	GO:0006915~apoptosis	9	9.67742	0.00722054	CASP6, AKTIP, ERBB3, BNIP3L, BCAP29, APAF1, ITSN1, BIRC3, AHR	65	602	13528	3.11147	0.830183	10.4147
GOTERM_BP_FAT	GO:0012501~programmed cell death	9	9.67742	0.00786952	CASP6, AKTIP, ERBB3, BNIP3L, BCAP29, APAF1, ITSN1, BIRC3, AHR	65	611	13528	3.06564	0.765376	11.2994
GOTERM_BP_FAT	GO:0042981~regulation of apoptosis	10	10.7527	0.0128936	CASP6, CUL5, IL7, ETS1, ERBB3, BNIP3L, APAF1, ITSN1, BIRC3, IP6K2	65	804	13528	2.5886	0.851191	17.8769
GOTERM_BP_FAT	GO:0043067~regulation of programmed cell death	10	10.7527	0.0136885	CASP6, CUL5, IL7, ETS1, ERBB3, BNIP3L, APAF1, ITSN1, BIRC3, IP6K2	65	812	13528	2.56309	0.814765	18.8748
GOTERM_BP_FAT	GO:0010941~regulation of cell death	10	10.7527	0.0139959	CASP6, CUL5, IL7, ETS1, ERBB3, BNIP3L, APAF1, ITSN1, BIRC3, IP6K2	65	815	13528	2.55366	0.771892	19.2576
GOTERM_BP_FAT	GO:0043065~positive regulation of apoptosis	6	6.45161	0.0524085	CASP6, CUL5, ETS1, BNIP3L, ITSN1, IP6K2	65	430	13528	2.90404	0.992839	55.8231
GOTERM_BP_FAT	GO:0043068~positive regulation of programmed cell death	6	6.45161	0.0536978	CASP6, CUL5, ETS1, BNIP3L, ITSN1, IP6K2	65	433	13528	2.88392	0.988906	56.7266
GOTERM_BP_FAT	GO:0010942~positive regulation of cell death	6	6.45161	0.0545677	CASP6, CUL5, ETS1, BNIP3L, ITSN1, IP6K2	65	435	13528	2.87066	0.983734	57.3264
GOTERM_BP_FAT	GO:0006694~steroid biosynthetic process	3	3.22581	0.061229	CYP51A1, HSD17B12, C14ORF1	65	85	13528	7.34552	0.985244	61.6685
GOTERM_BP_FAT	GO:0006917~induction of apoptosis	5	5.37634	0.0646775	CASP6, CUL5, ETS1, BNIP3L, ITSN1	65	320	13528	3.25192	0.983258	63.7507
GOTERM_BP_FAT	GO:0012502~induction of programmed cell death	5	5.37634	0.0652694	CASP6, CUL5, ETS1, BNIP3L, ITSN1	65	321	13528	3.24179	0.977874	64.0973
GOTERM_BP_FAT	GO:0043523~regulation of neuron apoptosis	3	3.22581	0.0676767	CASP6, ERBB3, ITSN1	65	90	13528	6.93744	0.974624	65.4752
GOTERM_BP_FAT	GO:0042127~regulation of cell proliferation	8	8.60215	0.0772724	ESRRA, CUL5, CDCA7, IL7, ETS1, ERBB3, CD274, AXIN2	65	787	13528	2.11561	0.98046	70.4918
GOTERM_BP_FAT	GO:0006891~intra-Golgi vesicle-mediated transport	2	2.15054	0.086216	CUX1, GOLGA3	65	19	13528	21.9077	0.984016	74.5465
GOTERM_BP_FAT	GO:0051402~neuron apoptosis	2	2.15054	0.086216	ERBB3, APAF1	65	19	13528	21.9077	0.984016	74.5465
GOTERM_BP_FAT	GO:0043066~negative regulation of apoptosis	5	5.37634	0.0863877	IL7, ERBB3, BNIP3L, ITSN1, BIRC3	65	354	13528	2.93959	0.979777	74.6189
GOTERM_BP_FAT	GO:0009968~negative regulation of signal transduction	4	4.30108	0.0869036	ATXN1, GRB10, ERBB3, AXIN2	65	221	13528	3.76693	0.975455	74.8356
GOTERM_BP_FAT	GO:0046907~intracellular transport	7	7.52688	0.0896083	ATXN1, CEP57, AKTIP, BCAP29, DOPEY1, CUX1, GOLGA3	65	657	13528	2.21745	0.973397	75.9434
GOTERM_BP_FAT	GO:0043069~negative regulation of programmed cell death	5	5.37634	0.0898493	IL7, ERBB3, BNIP3L, ITSN1, BIRC3	65	359	13528	2.89865	0.968417	76.0399
GOTERM_BP_FAT	GO:0060548~negative regulation of cell death	5	5.37634	0.0905497	IL7, ERBB3, BNIP3L, ITSN1, BIRC3	65	360	13528	2.8906	0.963757	76.3182
