# Supplementary material for: Comprehensive analysis of the lncRNA-associated ceRNA network identifies neuroinflammation biomarkers for Alzheimer's disease
Source: Royal Society of Chemistry journal article supplement (doi:10.1039/c9mo00129h), 2019-11-22
Supplement: c9mo00129h1.zip [file Table_S6.xls]

## Sheet: Sheet1
Table S5. KEGG pathway enrichment analysis for protein coding genes co-expressed with CTB-89H12.4.
Category	Term	Count	PValue	Genes	List Total	Pop Hits	Pop Total	Fold Enrichment	Benjamini	FDR(%)
KEGG_PATHWAY	hsa04725:Cholinergic synapse	25	9.54496e-08	ENSG00000081248, ENSG00000164742, ENSG00000118260, ENSG00000184156, ENSG00000105851, ENSG00000143578, ENSG00000180720, ENSG00000142875, ENSG00000100030, ENSG00000166501, ENSG00000051382, ENSG00000117020, ENSG00000145675, ENSG00000075043, ENSG00000133703, ENSG00000145349, ENSG00000173175, ENSG00000186469, ENSG00000121879, ENSG00000182621, ENSG00000127955, ENSG00000121281, ENSG00000114450, ENSG0000…	445	111	6910	3.49732	2.47211e-05	0.000124688
KEGG_PATHWAY	hsa04261:Adrenergic signaling in cardiomyocytes	29	1.23412e-07	ENSG00000081248, ENSG00000154001, ENSG00000164742, ENSG00000118260, ENSG00000136546, ENSG00000105851, ENSG00000143578, ENSG00000153956, ENSG00000142875, ENSG00000100030, ENSG00000051382, ENSG00000067842, ENSG00000117020, ENSG00000182389, ENSG00000111245, ENSG00000145675, ENSG00000113575, ENSG00000157087, ENSG00000145349, ENSG00000121879, ENSG00000173175, ENSG00000182621, ENSG00000127955, ENSG0000…	445	146	6910	3.08435	1.59818e-05	0.000161216
KEGG_PATHWAY	hsa04914:Progesterone-mediated oocyte maturation	20	1.79916e-06	ENSG00000117020, ENSG00000145675, ENSG00000164742, ENSG00000169679, ENSG00000107643, ENSG00000133703, ENSG00000137449, ENSG00000105851, ENSG00000157764, ENSG00000121879, ENSG00000173175, ENSG00000127955, ENSG00000121281, ENSG00000142875, ENSG00000072133, ENSG00000100030, ENSG00000107864, ENSG00000177189, ENSG00000051382, ENSG00000166851	445	87	6910	3.56968	0.000155315	0.00235025
KEGG_PATHWAY	hsa04024:cAMP signaling pathway	32	2.77862e-06	ENSG00000081248, ENSG00000135312, ENSG00000144191, ENSG00000118260, ENSG00000164742, ENSG00000105851, ENSG00000157764, ENSG00000143578, ENSG00000184845, ENSG00000134318, ENSG00000142875, ENSG00000100030, ENSG00000051382, ENSG00000164161, ENSG00000067842, ENSG00000117020, ENSG00000145675, ENSG00000120251, ENSG00000169676, ENSG00000107643, ENSG00000157087, ENSG00000164270, ENSG00000145349, ENSG0000…	445	198	6910	2.50959	0.0001799	0.00362972
KEGG_PATHWAY	hsa04723:Retrograde endocannabinoid signaling	21	4.83384e-06	ENSG00000081248, ENSG00000120251, ENSG00000164742, ENSG00000107643, ENSG00000145864, ENSG00000186469, ENSG00000173175, ENSG00000179520, ENSG00000186297, ENSG00000182621, ENSG00000127955, ENSG00000151834, ENSG00000121281, ENSG00000142875, ENSG00000100030, ENSG00000114450, ENSG00000079841, ENSG00000022355, ENSG00000109158, ENSG00000166501, ENSG00000104888	445	101	6910	3.22861	0.000250362	0.00631436
KEGG_PATHWAY	hsa04150:mTOR signaling pathway	15	1.23372e-05	ENSG00000117020, ENSG00000145675, ENSG00000105851, ENSG00000063046, ENSG00000157764, ENSG00000121879, ENSG00000171862, ENSG00000151247, ENSG00000072133, ENSG00000100030, ENSG00000166501, ENSG00000177189, ENSG00000118046, ENSG00000051382, ENSG00000132356	445	58	6910	4.01589	0.000532417	0.0161152
KEGG_PATHWAY	hsa04915:Estrogen signaling pathway	20	1.34195e-05	ENSG00000117020, ENSG00000109971, ENSG00000148082, ENSG00000145675, ENSG00000118260, ENSG00000164742, ENSG00000133703, ENSG00000105851, ENSG00000143578, ENSG00000121879, ENSG00000173175, ENSG00000182621, ENSG00000127955, ENSG00000121281, ENSG00000142875, ENSG00000100030, ENSG00000198668, ENSG00000213281, ENSG00000115966, ENSG00000051382	445	99	6910	3.13699	0.000496403	0.0175288
KEGG_PATHWAY	hsa04114:Oocyte meiosis	21	1.60698e-05	ENSG00000154001, ENSG00000135476, ENSG00000164742, ENSG00000169679, ENSG00000072803, ENSG00000113575, ENSG00000137449, ENSG00000145349, ENSG00000173175, ENSG00000108953, ENSG00000121281, ENSG00000142875, ENSG00000072133, ENSG00000113558, ENSG00000100030, ENSG00000198668, ENSG00000170027, ENSG00000107864, ENSG00000177189, ENSG00000164924, ENSG00000166851	445	109	6910	2.99165	0.000520128	0.0209903
KEGG_PATHWAY	hsa04022:cGMP-PKG signaling pathway	27	1.77778e-05	ENSG00000081248, ENSG00000164742, ENSG00000118260, ENSG00000183023, ENSG00000081189, ENSG00000105851, ENSG00000143578, ENSG00000133124, ENSG00000134318, ENSG00000100030, ENSG00000051382, ENSG00000067842, ENSG00000171132, ENSG00000117020, ENSG00000145675, ENSG00000157087, ENSG00000121879, ENSG00000173175, ENSG00000182621, ENSG00000127955, ENSG00000061918, ENSG00000121281, ENSG00000198668, ENSG0000…	445	166	6910	2.52565	0.000511479	0.023221
KEGG_PATHWAY	hsa04728:Dopaminergic synapse	23	1.80151e-05	ENSG00000154001, ENSG00000117020, ENSG00000120251, ENSG00000118260, ENSG00000169676, ENSG00000113575, ENSG00000107643, ENSG00000134852, ENSG00000145349, ENSG00000143578, ENSG00000144285, ENSG00000186469, ENSG00000173175, ENSG00000184845, ENSG00000182621, ENSG00000127955, ENSG00000082701, ENSG00000221914, ENSG00000142875, ENSG00000114450, ENSG00000198668, ENSG00000166501, ENSG00000115966	445	128	6910	2.7902	0.000466486	0.0235309
KEGG_PATHWAY	hsa04921:Oxytocin signaling pathway	26	2.15758e-05	ENSG00000081248, ENSG00000164742, ENSG00000105851, ENSG00000081189, ENSG00000004468, ENSG00000153956, ENSG00000134318, ENSG00000142875, ENSG00000100030, ENSG00000166501, ENSG00000051382, ENSG00000182389, ENSG00000145675, ENSG00000133703, ENSG00000145349, ENSG00000121879, ENSG00000173175, ENSG00000182621, ENSG00000127955, ENSG00000061918, ENSG00000121281, ENSG00000198668, ENSG00000213281, ENSG0000…	445	158	6910	2.55526	0.000507888	0.0281812
KEGG_PATHWAY	hsa04730:Long-term depression	14	8.51332e-05	ENSG00000152208, ENSG00000120251, ENSG00000113575, ENSG00000133703, ENSG00000157764, ENSG00000127955, ENSG00000182621, ENSG00000106341, ENSG00000061918, ENSG00000100030, ENSG00000166501, ENSG00000213281, ENSG00000152402, ENSG00000164116	445	60	6910	3.62322	0.00183585	0.111154
KEGG_PATHWAY	hsa04070:Phosphatidylinositol signaling system	18	0.000143157	ENSG00000102780, ENSG00000145675, ENSG00000078142, ENSG00000105851, ENSG00000155099, ENSG00000121879, ENSG00000171862, ENSG00000040933, ENSG00000182621, ENSG00000003987, ENSG00000157680, ENSG00000108389, ENSG00000198668, ENSG00000063601, ENSG00000166501, ENSG00000104331, ENSG00000051382, ENSG00000136267	445	98	6910	2.8521	0.00284826	0.186847
KEGG_PATHWAY	hsa05214:Glioma	14	0.00020142	ENSG00000117020, ENSG00000148082, ENSG00000145675, ENSG00000133703, ENSG00000105851, ENSG00000145349, ENSG00000157764, ENSG00000121879, ENSG00000171862, ENSG00000100030, ENSG00000198668, ENSG00000166501, ENSG00000213281, ENSG00000051382	445	65	6910	3.34451	0.00371971	0.2628
KEGG_PATHWAY	hsa04611:Platelet activation	21	0.000211959	ENSG00000117020, ENSG00000145675, ENSG00000164742, ENSG00000178732, ENSG00000105851, ENSG00000169313, ENSG00000121879, ENSG00000173175, ENSG00000182621, ENSG00000127955, ENSG00000134318, ENSG00000172575, ENSG00000121281, ENSG00000061918, ENSG00000142875, ENSG00000100030, ENSG00000169860, ENSG00000051382, ENSG00000152402, ENSG00000171914, ENSG00000164116	445	130	6910	2.50838	0.00365353	0.276533
KEGG_PATHWAY	hsa04727:GABAergic synapse	16	0.000287764	ENSG00000081248, ENSG00000164742, ENSG00000145864, ENSG00000186469, ENSG00000173175, ENSG00000073969, ENSG00000186297, ENSG00000127955, ENSG00000111371, ENSG00000121281, ENSG00000151834, ENSG00000142875, ENSG00000114450, ENSG00000109158, ENSG00000022355, ENSG00000166501	445	85	6910	2.92293	0.00464802	0.375261
KEGG_PATHWAY	hsa04713:Circadian entrainment	17	0.000317442	ENSG00000120251, ENSG00000164742, ENSG00000118260, ENSG00000145349, ENSG00000186469, ENSG00000173175, ENSG00000182621, ENSG00000127955, ENSG00000121281, ENSG00000061918, ENSG00000142875, ENSG00000100030, ENSG00000114450, ENSG00000198668, ENSG00000166501, ENSG00000152402, ENSG00000164116	445	95	6910	2.77871	0.00482542	0.413889
KEGG_PATHWAY	hsa04970:Salivary secretion	16	0.000328484	ENSG00000164742, ENSG00000263620, ENSG00000004468, ENSG00000157087, ENSG00000173175, ENSG00000182621, ENSG00000187908, ENSG00000061918, ENSG00000121281, ENSG00000142875, ENSG00000198668, ENSG00000166501, ENSG00000152402, ENSG00000070961, ENSG00000164116, ENSG00000067842	445	86	6910	2.88895	0.00471615	0.428257
KEGG_PATHWAY	hsa04012:ErbB signaling pathway	16	0.000374065	ENSG00000117020, ENSG00000148082, ENSG00000145675, ENSG00000107643, ENSG00000133703, ENSG00000105851, ENSG00000157764, ENSG00000145349, ENSG00000065559, ENSG00000121879, ENSG00000082701, ENSG00000178568, ENSG00000100030, ENSG00000166501, ENSG00000213281, ENSG00000051382	445	87	6910	2.85574	0.00508707	0.487548
KEGG_PATHWAY	hsa04540:Gap junction	16	0.000424971	ENSG00000135914, ENSG00000102468, ENSG00000164742, ENSG00000133703, ENSG00000173175, ENSG00000184845, ENSG00000182621, ENSG00000127955, ENSG00000061918, ENSG00000121281, ENSG00000142875, ENSG00000100030, ENSG00000166501, ENSG00000213281, ENSG00000152402, ENSG00000164116	445	88	6910	2.82329	0.00548942	0.553728
KEGG_PATHWAY	hsa05218:Melanoma	14	0.000500507	ENSG00000117020, ENSG00000102466, ENSG00000145675, ENSG00000114279, ENSG00000100030, ENSG00000133703, ENSG00000105851, ENSG00000140285, ENSG00000213281, ENSG00000157764, ENSG00000051382, ENSG00000070193, ENSG00000171862, ENSG00000121879	445	71	6910	3.06188	0.00615544	0.651853
KEGG_PATHWAY	hsa04722:Neurotrophin signaling pathway	19	0.000594881	ENSG00000117020, ENSG00000148082, ENSG00000145675, ENSG00000107643, ENSG00000133703, ENSG00000105851, ENSG00000157764, ENSG00000145349, ENSG00000121879, ENSG00000108953, ENSG00000082701, ENSG00000072133, ENSG00000100030, ENSG00000198668, ENSG00000177189, ENSG00000213281, ENSG00000051382, ENSG00000134313, ENSG00000176697	445	120	6910	2.45861	0.00698097	0.774324
KEGG_PATHWAY	hsa04071:Sphingolipid signaling pathway	19	0.000594881	ENSG00000171132, ENSG00000117020, ENSG00000154001, ENSG00000145675, ENSG00000113575, ENSG00000107643, ENSG00000133703, ENSG00000105851, ENSG00000121879, ENSG00000171862, ENSG00000182621, ENSG00000127955, ENSG00000172292, ENSG00000134318, ENSG00000221914, ENSG00000100030, ENSG00000166501, ENSG00000213281, ENSG00000051382	445	120	6910	2.45861	0.00698097	0.774324
KEGG_PATHWAY	hsa04726:Serotonergic synapse	18	0.000657592	ENSG00000081248, ENSG00000135914, ENSG00000135312, ENSG00000102468, ENSG00000133703, ENSG00000145864, ENSG00000164270, ENSG00000157764, ENSG00000186469, ENSG00000173175, ENSG00000182621, ENSG00000127955, ENSG00000142875, ENSG00000114450, ENSG00000100030, ENSG00000166501, ENSG00000213281, ENSG00000139287	445	111	6910	2.51807	0.00738013	0.855628
KEGG_PATHWAY	hsa04720:Long-term potentiation	13	0.000872278	ENSG00000120251, ENSG00000164742, ENSG00000133703, ENSG00000145349, ENSG00000157764, ENSG00000182621, ENSG00000142875, ENSG00000072133, ENSG00000100030, ENSG00000198668, ENSG00000177189, ENSG00000213281, ENSG00000166501	445	66	6910	3.05856	0.00937323	1.1335
KEGG_PATHWAY	hsa04724:Glutamatergic synapse	18	0.000897154	ENSG00000100077, ENSG00000120251, ENSG00000170579, ENSG00000164742, ENSG00000186469, ENSG00000173175, ENSG00000179520, ENSG00000182621, ENSG00000127955, ENSG00000111371, ENSG00000121281, ENSG00000142875, ENSG00000100030, ENSG00000114450, ENSG00000166501, ENSG00000198822, ENSG00000198785, ENSG00000104888	445	114	6910	2.4518	0.00925558	1.16565
KEGG_PATHWAY	hsa05030:Cocaine addiction	11	0.00091941	ENSG00000127955, ENSG00000120251, ENSG00000118260, ENSG00000142875, ENSG00000198822, ENSG00000115966, ENSG00000198785, ENSG00000143578, ENSG00000184845, ENSG00000173175, ENSG00000176697	445	49	6910	3.4859	0.0091211	1.19441
KEGG_PATHWAY	hsa04911:Insulin secretion	15	0.00093408	ENSG00000081248, ENSG00000164742, ENSG00000118260, ENSG00000141433, ENSG00000263620, ENSG00000145349, ENSG00000143578, ENSG00000173175, ENSG00000182621, ENSG00000186472, ENSG00000163394, ENSG00000121281, ENSG00000142875, ENSG00000166501, ENSG00000115966	445	85	6910	2.74025	0.00892437	1.21336
KEGG_PATHWAY	hsa04020:Calcium signaling pathway	24	0.00104771	ENSG00000081248, ENSG00000135914, ENSG00000126010, ENSG00000102468, ENSG00000169676, ENSG00000164742, ENSG00000183023, ENSG00000115353, ENSG00000213906, ENSG00000157087, ENSG00000004468, ENSG00000164270, ENSG00000145349, ENSG00000184845, ENSG00000182621, ENSG00000121281, ENSG00000178568, ENSG00000163394, ENSG00000102893, ENSG00000142875, ENSG00000198668, ENSG00000166501, ENSG00000070961, ENSG0000…	445	179	6910	2.08198	0.00964956	1.36003
KEGG_PATHWAY	hsa04360:Axon guidance	19	0.00117529	ENSG00000074527, ENSG00000125266, ENSG00000133703, ENSG00000044524, ENSG00000145147, ENSG00000185008, ENSG00000156687, ENSG00000187122, ENSG00000145242, ENSG00000127955, ENSG00000082701, ENSG00000080224, ENSG00000134318, ENSG00000187323, ENSG00000100030, ENSG00000213281, ENSG00000184347, ENSG00000112902, ENSG00000153993	445	127	6910	2.3231	0.0104478	1.52447
KEGG_PATHWAY	hsa04910:Insulin signaling pathway	20	0.00123557	ENSG00000117020, ENSG00000148082, ENSG00000145675, ENSG00000107643, ENSG00000133703, ENSG00000105851, ENSG00000157764, ENSG00000121879, ENSG00000133124, ENSG00000082701, ENSG00000108946, ENSG00000151247, ENSG00000102893, ENSG00000142875, ENSG00000100030, ENSG00000198668, ENSG00000213281, ENSG00000051382, ENSG00000005249, ENSG00000132356	445	138	6910	2.25045	0.0106169	1.60208
KEGG_PATHWAY	hsa04750:Inflammatory mediator regulation of TRP channels	16	0.00135393	ENSG00000171132, ENSG00000135914, ENSG00000102468, ENSG00000145675, ENSG00000164742, ENSG00000107643, ENSG00000105851, ENSG00000145349, ENSG00000121879, ENSG00000173175, ENSG00000182621, ENSG00000121281, ENSG00000142875, ENSG00000198668, ENSG00000166501, ENSG00000051382	445	98	6910	2.5352	0.0112557	1.75429
KEGG_PATHWAY	hsa05213:Endometrial cancer	11	0.00148849	ENSG00000117020, ENSG00000082701, ENSG00000145675, ENSG00000100030, ENSG00000133703, ENSG00000105851, ENSG00000213281, ENSG00000157764, ENSG00000051382, ENSG00000171862, ENSG00000121879	445	52	6910	3.28479	0.0119841	1.92709
KEGG_PATHWAY	hsa04916:Melanogenesis	16	0.0016681	ENSG00000049130, ENSG00000164742, ENSG00000118260, ENSG00000133703, ENSG00000145349, ENSG00000143578, ENSG00000173175, ENSG00000182621, ENSG00000127955, ENSG00000082701, ENSG00000121281, ENSG00000142875, ENSG00000100030, ENSG00000198668, ENSG00000166501, ENSG00000213281	445	100	6910	2.48449	0.0130175	2.15728
KEGG_PATHWAY	hsa05210:Colorectal cancer	12	0.00174616	ENSG00000117020, ENSG00000082701, ENSG00000157500, ENSG00000145675, ENSG00000100030, ENSG00000133703, ENSG00000107643, ENSG00000187323, ENSG00000105851, ENSG00000157764, ENSG00000051382, ENSG00000121879	445	62	6910	3.00544	0.0132251	2.25718
KEGG_PATHWAY	hsa04925:Aldosterone synthesis and secretion	14	0.00179734	ENSG00000081248, ENSG00000171132, ENSG00000164742, ENSG00000118260, ENSG00000145349, ENSG00000143578, ENSG00000173175, ENSG00000182621, ENSG00000121281, ENSG00000142875, ENSG00000153234, ENSG00000198668, ENSG00000166501, ENSG00000115966	445	81	6910	2.68387	0.0132241	2.32262
KEGG_PATHWAY	hsa05032:Morphine addiction	15	0.0018443	ENSG00000100077, ENSG00000164742, ENSG00000145864, ENSG00000186469, ENSG00000173175, ENSG00000184845, ENSG00000186297, ENSG00000127955, ENSG00000151834, ENSG00000121281, ENSG00000142875, ENSG00000114450, ENSG00000109158, ENSG00000022355, ENSG00000166501	445	91	6910	2.55958	0.0131931	2.38263
KEGG_PATHWAY	hsa04924:Renin secretion	12	0.00227489	ENSG00000081248, ENSG00000127955, ENSG00000182621, ENSG00000143839, ENSG00000061918, ENSG00000118260, ENSG00000142875, ENSG00000141433, ENSG00000198668, ENSG00000152402, ENSG00000173175, ENSG00000164116	445	64	6910	2.91152	0.015816	2.93131
KEGG_PATHWAY	hsa04923:Regulation of lipolysis in adipocytes	11	0.00266082	ENSG00000117020, ENSG00000127955, ENSG00000133124, ENSG00000145675, ENSG00000164742, ENSG00000121281, ENSG00000142875, ENSG00000105851, ENSG00000051382, ENSG00000173175, ENSG00000121879	445	56	6910	3.05016	0.0179959	3.42065
KEGG_PATHWAY	hsa04530:Tight junction	19	0.00279382	ENSG00000171132, ENSG00000117020, ENSG00000111245, ENSG00000079819, ENSG00000113946, ENSG00000113575, ENSG00000133703, ENSG00000147044, ENSG00000204435, ENSG00000171862, ENSG00000127955, ENSG00000221914, ENSG00000166501, ENSG00000213281, ENSG00000166025, ENSG00000116539, ENSG00000088367, ENSG00000151276, ENSG00000133026	445	137	6910	2.15353	0.0184083	3.58876
KEGG_PATHWAY	hsa05033:Nicotine addiction	9	0.00338215	ENSG00000120251, ENSG00000151834, ENSG00000022355, ENSG00000145864, ENSG00000109158, ENSG00000198785, ENSG00000104888, ENSG00000179520, ENSG00000186297	445	40	6910	3.49382	0.0216977	4.32916
KEGG_PATHWAY	hsa04931:Insulin resistance	16	0.00359736	ENSG00000171132, ENSG00000117020, ENSG00000145675, ENSG00000118260, ENSG00000107643, ENSG00000105851, ENSG00000198380, ENSG00000143578, ENSG00000121879, ENSG00000171862, ENSG00000082701, ENSG00000131408, ENSG00000072133, ENSG00000177189, ENSG00000051382, ENSG00000132356	445	108	6910	2.30046	0.0225086	4.59869
KEGG_PATHWAY	hsa04062:Chemokine signaling pathway	23	0.00383706	ENSG00000117020, ENSG00000148082, ENSG00000100077, ENSG00000106299, ENSG00000145675, ENSG00000164742, ENSG00000133703, ENSG00000105851, ENSG00000157764, ENSG00000186469, ENSG00000121879, ENSG00000173175, ENSG00000182621, ENSG00000127955, ENSG00000082701, ENSG00000134318, ENSG00000121281, ENSG00000142875, ENSG00000114450, ENSG00000100030, ENSG00000173585, ENSG00000213281, ENSG00000051382	445	186	6910	1.92014	0.0234286	4.89806
